# Supplementary material
Source: publisher figshare collection journal article supplement (https://tandf.figshare.com/articles/dataset/_/23808098)
Supplement: Supplementary file 1 [file 1]

# Supplements to “A Class of Hierarchical Multivariate Wiener Processes for Modeling Dependent Degradation Data”

Guanqi Fang<sup>1,2</sup> and Rong Pan<sup>\*3</sup>

<sup>1</sup> Collaborative Innovation Center of Statistical Data Engineering Technology & Application, Zhejiang Gongshang University

<sup>2</sup> School of Statistics and Mathematics, Zhejiang Gongshang University

<sup>3</sup> School of Computing and Augmented Intelligence, Arizona State University

## A Derivation of Equation (7)

To derive the conditional (posterior) distribution of  $\mathbf{b}_i$  given  $\tilde{\mathbf{y}}_i(t, 0)$ , we make use of the Bayes' rule. That is

$$\begin{aligned}
 & f(\mathbf{b}_i | \tilde{\mathbf{y}}_i(t, 0)) \\
 & \propto f(\tilde{\mathbf{y}}_i(t, 0) | \mathbf{b}_i) f(\mathbf{b}_i) \\
 & \propto \exp \left[ -\frac{1}{2} (\tilde{\mathbf{y}}_i(t, 0) - t\mathbf{b}_i)' (t\mathbf{D})^{-1} (\tilde{\mathbf{y}}_i(t, 0) - t\mathbf{b}_i) \right] \times \exp \left[ -\frac{1}{2} (\mathbf{b}_i - \boldsymbol{\mu}_b)' \boldsymbol{\Sigma}_b^{-1} (\mathbf{b}_i - \boldsymbol{\mu}_b) \right] \\
 & \propto \exp \left[ -\frac{1}{2} (t\mathbf{b}_i)' (t\mathbf{D})^{-1} (t\mathbf{b}_i) + (t\mathbf{b}_i)' (t\mathbf{D})^{-1} \tilde{\mathbf{y}}_i(t, 0) \right] \times \exp \left[ -\frac{1}{2} \mathbf{b}_i' \boldsymbol{\Sigma}_b^{-1} \mathbf{b}_i + \mathbf{b}_i' \boldsymbol{\Sigma}_b^{-1} \boldsymbol{\mu}_b \right] \\
 & = \exp \left[ -\frac{1}{2} \mathbf{b}_i' (\boldsymbol{\Sigma}_b^{-1} + t\mathbf{D}^{-1}) \mathbf{b}_i + \mathbf{b}_i' (\boldsymbol{\Sigma}_b^{-1} \boldsymbol{\mu}_b + \mathbf{D}^{-1} \tilde{\mathbf{y}}_i(t, 0)) \right].
 \end{aligned}$$

The derivation is analogous to finding the posterior mean of a MVN distribution when a semi-conjugate prior for the mean is given. For details, please refer to pages 107–108 of Hoff's book (2009).

## B Derivation of Equation (8)

Similar to the above, the conditional (posterior) distribution  $\mathbf{b}_i | \mathbf{y}_i(0), \tilde{\mathbf{y}}_i(t, 0)$  is derived as

$$\begin{aligned}
 & f(\mathbf{b}_i | \mathbf{y}_i(0), \tilde{\mathbf{y}}_i(t, 0)) \\
 & \propto f(\mathbf{y}_i(0) | \mathbf{b}_i) f(\tilde{\mathbf{y}}_i(t, 0) | \mathbf{b}_i) f(\mathbf{b}_i)
 \end{aligned}$$

$$\begin{aligned}
& \propto \exp \left[ -\frac{1}{2} \left( \mathbf{y}_i(0) - \boldsymbol{\mu}_{Y_i(0)|b_i} \right)' \boldsymbol{\Sigma}_{Y_i(0)|b_i}^{-1} \left( \mathbf{y}_i(0) - \boldsymbol{\mu}_{Y_i(0)|b_i} \right) \right] \times \\
& \exp \left[ -\frac{1}{2} \left( \tilde{\mathbf{y}}_i(t, 0) - t\mathbf{b}_i \right)' (t\mathbf{D})^{-1} \left( \tilde{\mathbf{y}}_i(t, 0) - t\mathbf{b}_i \right) \right] \times \\
& \exp \left[ -\frac{1}{2} \left( \mathbf{b}_i - \boldsymbol{\mu}_b \right)' \boldsymbol{\Sigma}_b^{-1} \left( \mathbf{b}_i - \boldsymbol{\mu}_b \right) \right] \\
& \propto \exp \left[ -\frac{1}{2} \mathbf{b}_i' \left( \boldsymbol{\Sigma}_b^{-1} \boldsymbol{\Sigma}_{ba} \boldsymbol{\Sigma}_{Y_i(0)|b_i}^{-1} \boldsymbol{\Sigma}_{ab} \boldsymbol{\Sigma}_b^{-1} \right) \mathbf{b}_i + \right. \\
& \quad \left. \mathbf{b}_i' \boldsymbol{\Sigma}_b^{-1} \boldsymbol{\Sigma}_{ba} \boldsymbol{\Sigma}_{Y_i(0)|b_i}^{-1} \left( \mathbf{y}_i(0) - \boldsymbol{\mu}_a + \boldsymbol{\Sigma}_{ab} \boldsymbol{\Sigma}_b^{-1} \boldsymbol{\mu}_b \right) \right] \times \\
& \exp \left[ -\frac{1}{2} (t\mathbf{b}_i)' (t\mathbf{D})^{-1} (t\mathbf{b}_i) + (t\mathbf{b}_i)' (t\mathbf{D})^{-1} \tilde{\mathbf{y}}_i(t, 0) \right] \times \\
& \exp \left[ -\frac{1}{2} \mathbf{b}_i' \boldsymbol{\Sigma}_b^{-1} \mathbf{b}_i + \mathbf{b}_i' \boldsymbol{\Sigma}_b^{-1} \boldsymbol{\mu}_b \right] \\
& = \exp \left\{ -\frac{1}{2} \mathbf{b}_i' \left( \boldsymbol{\Sigma}_b^{-1} + t\mathbf{D}^{-1} + \boldsymbol{\Sigma}_b^{-1} \boldsymbol{\Sigma}_{ba} \boldsymbol{\Sigma}_{Y_i(0)|b_i}^{-1} \boldsymbol{\Sigma}_{ab} \boldsymbol{\Sigma}_b^{-1} \right) \mathbf{b}_i + \right. \\
& \quad \left. \mathbf{b}_i' \left[ \boldsymbol{\Sigma}_b^{-1} \boldsymbol{\mu}_b + \mathbf{D}^{-1} \tilde{\mathbf{y}}_i(t, 0) + \boldsymbol{\Sigma}_b^{-1} \boldsymbol{\Sigma}_{ba} \boldsymbol{\Sigma}_{Y_i(0)|b_i}^{-1} \left( \mathbf{y}_i(0) - \boldsymbol{\mu}_a + \boldsymbol{\Sigma}_{ab} \boldsymbol{\Sigma}_b^{-1} \boldsymbol{\mu}_b \right) \right] \right\}.
\end{aligned}$$

## C Derivation of the Conditional (Posterior) Distribution for Models $M_3$ and $M_4$

❶ For model  $M_3$ , similar to the derivation of Equation (8), if both  $y_{ij}(0)$  and  $\tilde{y}_{ij}(t, 0)$  are known, the conditional (posterior) distribution of  $b_{ij}$  is

$$\begin{aligned}
& f(b_{ij} | y_{ij}(0), \tilde{y}_{ij}(t, 0)) \\
& \propto f(y_{ij}(0) | b_{ij}) f(\tilde{y}_{ij}(t, 0) | b_{ij}) f(b_{ij}) \\
& \propto \exp \left[ -\frac{1}{2\sigma_{Y_{ij}(0)|b_{ij}}^2} \left( y_{ij}(0) - \mu_{Y_{ij}(0)|b_{ij}} \right)^2 \right] \times \\
& \exp \left[ -\frac{1}{2t\sigma_j^2} \left( \tilde{y}_{ij}(t, 0) - tb_{ij} \right)^2 \right] \times \exp \left[ -\frac{1}{2\sigma_{bj}^2} (b_{ij} - \mu_{bj})^2 \right] \\
& \propto \exp \left\{ -\frac{(\rho_j^{ab})^2}{2\sigma_{bj}^2 [1 - (\rho_j^{ab})^2]} b_{ij}^2 + \frac{\rho_j^{ab} \left( y_{ij}(0) - \mu_{aj} + \frac{\sigma_{aj}}{\sigma_{bj}} \rho_j^{ab} \mu_{bj} \right)}{[1 - (\rho_j^{ab})^2] \sigma_{aj} \sigma_{bj}} b_{ij} \right\} \times
\end{aligned}$$

$$\begin{aligned}
& \exp \left[ -\frac{t}{2\sigma_j^2} b_{ij}^2 + \frac{\tilde{y}_{ij}(t, 0)}{\sigma_j^2} b_{ij} \right] \times \exp \left[ -\frac{1}{2\sigma_{bj}^2} b_{ij}^2 + \frac{\mu_{bj}}{\sigma_{bj}^2} b_{ij} \right] \\
& \propto \exp \left\{ -\frac{1}{2} \left[ \frac{1}{\sigma_{bj}^2} + \frac{t}{\sigma_j^2} + \frac{(\rho_j^{ab})^2}{\sigma_{bj}^2 [1 - (\rho_j^{ab})^2]} \right] b_{ij}^2 + \right. \\
& \quad \left. \left[ \frac{\mu_{bj}}{\sigma_{bj}^2} + \frac{\tilde{y}_{ij}(t, 0)}{\sigma_j^2} + \frac{\rho_j^{ab} (y_{ij}(0) - \mu_{aj} + \frac{\sigma_{aj}}{\sigma_{bj}} \rho_j^{ab} \mu_{bj})}{[1 - (\rho_j^{ab})^2] \sigma_{aj} \sigma_{bj}} \right] b_{ij} \right\}.
\end{aligned}$$

Thus, this suggests that the distribution of  $b_{ij}$  given  $y_{ij}(0)$  and  $\tilde{y}_{ij}(t, 0)$  is

$$b_{ij}|y_{ij}(0), \tilde{y}_{ij}(t, 0) \sim \mathcal{N} \left( \mu_{b_{ij}|y_{ij}(0), \tilde{y}_{ij}(t, 0)}, \sigma_{b_{ij}|y_{ij}(0), \tilde{y}_{ij}(t, 0)}^2 \right),$$

where

$$\begin{aligned}
\mu_{b_{ij}|y_{ij}(0), \tilde{y}_{ij}(t, 0)} &= \left[ \frac{1}{\sigma_{bj}^2} + \frac{t}{\sigma_j^2} + \frac{(\rho_j^{ab})^2}{\sigma_{bj}^2 [1 - (\rho_j^{ab})^2]} \right]^{-1} \times \\
& \quad \left[ \frac{\mu_{bj}}{\sigma_{bj}^2} + \frac{\tilde{y}_{ij}(t, 0)}{\sigma_j^2} + \frac{\rho_j^{ab} (y_{ij}(0) - \mu_{aj} + \frac{\sigma_{aj}}{\sigma_{bj}} \rho_j^{ab} \mu_{bj})}{[1 - (\rho_j^{ab})^2] \sigma_{aj} \sigma_{bj}} \right] \text{ and} \\
\sigma_{b_{ij}|y_{ij}(0), \tilde{y}_{ij}(t, 0)}^2 &= \left[ \frac{1}{\sigma_{bj}^2} + \frac{t}{\sigma_j^2} + \frac{(\rho_j^{ab})^2}{\sigma_{bj}^2 [1 - (\rho_j^{ab})^2]} \right]^{-1}.
\end{aligned}$$

It is noted that if  $y_{ij}(0)$  and  $b_{ij}$  are independent,  $b_{ij}|y_{ij}(0), \tilde{y}_{ij}(t, 0)$  degenerates to  $b_{ij}|\tilde{y}_{ij}(t, 0)$ . Its distribution can be found by setting  $\rho_j^{ab} = 0$ ; that is

$$b_{ij}|\tilde{y}_{ij}(t, 0) \sim \mathcal{N} \left( \mu_{b_{ij}|\tilde{y}_{ij}(t, 0)}, \sigma_{b_{ij}|\tilde{y}_{ij}(t, 0)}^2 \right),$$

where

$$\begin{aligned}
\mu_{b_{ij}|y_{ij}(0), \tilde{y}_{ij}(t, 0)} &= \left[ \frac{1}{\sigma_{bj}^2} + \frac{t}{\sigma_j^2} \right]^{-1} \left[ \frac{\mu_{bj}}{\sigma_{bj}^2} + \frac{\tilde{y}_{ij}(t, 0)}{\sigma_j^2} \right] \text{ and} \\
\sigma_{b_{ij}|y_{ij}(0), \tilde{y}_{ij}(t, 0)}^2 &= \left[ \frac{1}{\sigma_{bj}^2} + \frac{t}{\sigma_j^2} \right]^{-1}.
\end{aligned}$$

This result matches the conclusion regarding the distribution of  $b_{ij}$  given  $\tilde{y}_{ij}(t, 0)$  as presented by Equation (14) in Li et al. (2015).

② For model  $M_4$ , if both  $\mathbf{y}_i(0)$  and  $\tilde{\mathbf{y}}_i(t, 0)$  are known, the conditional (posterior) distribution of  $b_i$  is

$$\begin{aligned}
& f(b_i | \mathbf{y}_i(0), \tilde{\mathbf{y}}_i(t, 0)) \\
& \propto f(\mathbf{y}_i(0) | b_i) f(\tilde{\mathbf{y}}_i(t, 0) | b_i) f(b_i) \\
& \propto \exp \left[ -\frac{1}{2} \sum_{j=1}^p \frac{(y_{ij}(0) - \mu_{aj} \mu_{a_i | b_i})^2}{\mu_{aj}^2 \sigma_{a_i | b_i}^2} \right] \times \exp \left[ -\frac{1}{2} \sum_{j=1}^p \frac{(\tilde{y}_{ij}(t, 0) - t \mu_{bj} b_i)^2}{t \sigma_j^2} \right] \times \exp \left[ -\frac{(b_i - 1)^2}{2 \sigma_b^2} \right] \\
& \propto \exp \left\{ -\frac{b_i^2}{2} \frac{p \rho_{ab}^2}{\sigma_b^2 (1 - \rho_{ab}^2)} + b_i \frac{\rho_{ab}}{\sigma_a \sigma_b (1 - \rho_{ab}^2)} \sum_{j=1}^p \left( \frac{y_{ij}(0)}{\mu_{aj}} - 1 + \rho_{ab} \frac{\sigma_a}{\sigma_b} \right) \right\} \times \\
& \quad \exp \left[ -\frac{b_i^2}{2} \sum_{j=1}^p \frac{t \mu_{bj}^2}{\sigma_j^2} + b_i \sum_{j=1}^p \frac{\mu_{bj} \tilde{y}_{ij}(t, 0)}{\sigma_j^2} \right] \times \exp \left[ -\frac{b_i^2}{2 \sigma_b^2} + \frac{b_i}{\sigma_b^2} \right] \\
& \propto \exp \left\{ -\frac{1}{2} \left[ \frac{1}{\sigma_b^2} + \sum_{j=1}^p \frac{t \mu_{bj}^2}{\sigma_j^2} + \frac{p \rho_{ab}^2}{\sigma_b^2 (1 - \rho_{ab}^2)} \right] b_i^2 + \right. \\
& \quad \left. \left[ \frac{1}{\sigma_b^2} + \sum_{j=1}^p \frac{\mu_{bj} \tilde{y}_{ij}(t, 0)}{\sigma_j^2} + \frac{\rho_{ab}}{\sigma_a \sigma_b (1 - \rho_{ab}^2)} \sum_{j=1}^p \left( \frac{y_{ij}(0)}{\mu_{aj}} - 1 + \rho_{ab} \frac{\sigma_a}{\sigma_b} \right) \right] b_i \right\}.
\end{aligned}$$

Thus, this suggests that the distribution of  $b_i$  given  $\mathbf{y}_i(0)$  and  $\tilde{\mathbf{y}}_i(t, 0)$  is

$$b_i | \mathbf{y}_i(0), \tilde{\mathbf{y}}_i(t, 0) \sim \mathcal{N} \left( \mu_{b_i | \mathbf{y}_i(0), \tilde{\mathbf{y}}_i(t, 0)}, \sigma_{b_i | \mathbf{y}_i(0), \tilde{\mathbf{y}}_i(t, 0)}^2 \right),$$

where

$$\begin{aligned}
\mu_{b_i | \mathbf{y}_i(0), \tilde{\mathbf{y}}_i(t, 0)} &= \left[ \frac{1}{\sigma_b^2} + \sum_{j=1}^p \frac{t \mu_{bj}^2}{\sigma_j^2} + \frac{p \rho_{ab}^2}{\sigma_b^2 (1 - \rho_{ab}^2)} \right]^{-1} \times \\
& \quad \left[ \frac{1}{\sigma_b^2} + \sum_{j=1}^p \frac{\mu_{bj} \tilde{y}_{ij}(t, 0)}{\sigma_j^2} + \frac{\rho_{ab}}{\sigma_a \sigma_b (1 - \rho_{ab}^2)} \sum_{j=1}^p \left( \frac{y_{ij}(0)}{\mu_{aj}} - 1 + \rho_{ab} \frac{\sigma_a}{\sigma_b} \right) \right] \text{ and} \\
\sigma_{b_i | \mathbf{y}_i(0), \tilde{\mathbf{y}}_i(t, 0)}^2 &= \left[ \frac{1}{\sigma_b^2} + \sum_{j=1}^p \frac{t \mu_{bj}^2}{\sigma_j^2} + \frac{p \rho_{ab}^2}{\sigma_b^2 (1 - \rho_{ab}^2)} \right]^{-1}.
\end{aligned}$$

## D The EM Algorithm for Statistical Inference

### D.1 Main Technical Details

To implement the EM algorithm, a useful lemma (shown as Lemma 3 below) indicated on page 107 of Rencher and Schaafje's book (2008) is first presented.

**Lemma 3.** If  $\mathbf{x}$  is a random vector with mean  $\boldsymbol{\mu}$  and variance-covariance matrix  $\boldsymbol{\Sigma}$  and if  $\mathbf{A}$  is a symmetric matrix of constants, then  $E_{\mathbf{x}}[\mathbf{x}'\mathbf{A}\mathbf{x}] = \text{tr}(\mathbf{A}\boldsymbol{\Sigma}) + \boldsymbol{\mu}'\mathbf{A}\boldsymbol{\mu}$ .

Recall that  $\{\mathbb{Y}_0, \mathbb{D}, \mathbf{b}\}$  denotes the complete data, and the total log-likelihood function (up to a constant) is given by

$$\ell(\boldsymbol{\theta}; \mathbb{Y}_0, \mathbb{D}, \mathbf{b}) = \ell(\mathbf{D}; \mathbb{D} \mid \mathbf{b}) + \ell(\boldsymbol{\mu}_a, \boldsymbol{\mu}_b, \boldsymbol{\Sigma}_a, \boldsymbol{\Sigma}_b, \boldsymbol{\Sigma}_{ab}; \mathbf{b} \mid \mathbb{Y}_0) + \ell(\boldsymbol{\mu}_a, \boldsymbol{\Sigma}_a; \mathbb{Y}_0),$$

where

$$\begin{aligned} \ell(\mathbf{D}; \mathbb{D} \mid \mathbf{b}) &= -\frac{1}{2} \sum_{i=1}^n \sum_{j=1}^p \sum_{k=1}^{m_i} \left[ \ln(\tilde{\mathbf{t}}_{ik} \sigma_j^2) + \frac{(\tilde{y}_{ijk} - \tilde{\mathbf{t}}_{ik} b_{ij})^2}{\tilde{\mathbf{t}}_{ik} \sigma_j^2} \right], \\ \ell(\boldsymbol{\mu}_a, \boldsymbol{\mu}_b, \boldsymbol{\Sigma}_a, \boldsymbol{\Sigma}_b, \boldsymbol{\Sigma}_{ab}; \mathbf{b} \mid \mathbb{Y}_0) &= -\frac{1}{2} \sum_{i=1}^n \left[ \ln |\boldsymbol{\Sigma}_{b_i | \mathbf{y}_{i0}}| + (\mathbf{b}_i - \boldsymbol{\mu}_{b_i | \mathbf{y}_{i0}})' \boldsymbol{\Sigma}_{b_i | \mathbf{y}_{i0}}^{-1} (\mathbf{b}_i - \boldsymbol{\mu}_{b_i | \mathbf{y}_{i0}}) \right], \text{ and} \\ \ell(\boldsymbol{\mu}_a, \boldsymbol{\Sigma}_a; \mathbb{Y}_0) &= -\frac{1}{2} \sum_{i=1}^n \left[ \ln |\boldsymbol{\Sigma}_a| + (\mathbf{y}_{i0} - \boldsymbol{\mu}_a)' \boldsymbol{\Sigma}_a^{-1} (\mathbf{y}_{i0} - \boldsymbol{\mu}_a) \right]. \end{aligned}$$

Note that once  $\mathbb{Y}_0$  is known, it is immediate to get the estimates of  $\boldsymbol{\mu}_a$  and  $\boldsymbol{\Sigma}_a$ :

$$\hat{\boldsymbol{\mu}}_a = \frac{1}{n} \sum_{i=1}^n \mathbf{y}_{i0} \text{ and } \hat{\boldsymbol{\Sigma}}_a = \frac{1}{n-1} \sum_{i=1}^n (\mathbf{y}_{i0} - \hat{\boldsymbol{\mu}}_a)(\mathbf{y}_{i0} - \hat{\boldsymbol{\mu}}_a)'.$$

So the algorithm only needs to deal with  $\ell(\mathbf{D}; \mathbb{D} \mid \mathbf{b})$  and  $\ell(\boldsymbol{\mu}_a, \boldsymbol{\mu}_b, \boldsymbol{\Sigma}_a, \boldsymbol{\Sigma}_b, \boldsymbol{\Sigma}_{ab}; \mathbf{b} \mid \mathbb{Y}_0)$  iteratively. Given the current EM estimate  $\boldsymbol{\theta}^{(s)}$  consisting of  $\hat{\boldsymbol{\mu}}_a, \boldsymbol{\mu}_b^{(s)}, \hat{\boldsymbol{\Sigma}}_a, \boldsymbol{\Sigma}_b^{(s)}, \boldsymbol{\Sigma}_{ab}^{(s)}$ , and  $\mathbf{D}^{(s)}$ , the algorithm is performed according to the following steps:

- E-step: First, based on Equation (8),  $\mathbf{b} \mid \mathbb{Y}_0, \mathbb{D}, \boldsymbol{\theta}^{(s)}$  or concretely  $\mathbf{b}_i \mid \mathbf{y}_{i0}, \tilde{\mathbf{y}}_i, \tilde{\mathbf{t}}_i, \boldsymbol{\theta}^{(s)}$  is subject to a MVN distribution with mean vector

$$\begin{aligned} \check{\boldsymbol{\mu}}_{b_i}^{(s)} &\equiv \left( \check{\mu}_{b_i,1}^{(s)}, \check{\mu}_{b_i,2}^{(s)}, \dots, \check{\mu}_{b_i,p}^{(s)} \right)' \\ &= \left( \boldsymbol{\Sigma}_b^{(s)-1} + t_{im_i} \mathbf{D}^{(s)-1} + \boldsymbol{\Sigma}_b^{(s)-1} \boldsymbol{\Sigma}_{ba}^{(s)} \boldsymbol{\Sigma}_{Y_{i(0)|b_i}}^{(s)-1} \boldsymbol{\Sigma}_{ab}^{(s)} \boldsymbol{\Sigma}_b^{(s)-1} \right)^{-1} \left[ \boldsymbol{\Sigma}_b^{(s)-1} \boldsymbol{\mu}_b^{(s)} + \right. \\ &\quad \left. \mathbf{D}^{(s)-1} (\mathbf{y}_{im_i} - \mathbf{y}_{i0}) + \boldsymbol{\Sigma}_b^{(s)-1} \boldsymbol{\Sigma}_{ba}^{(s)} \boldsymbol{\Sigma}_{Y_{i(0)|b_i}}^{(s)-1} (\mathbf{y}_{i0} - \hat{\boldsymbol{\mu}}_a + \boldsymbol{\Sigma}_{ab}^{(s)} \boldsymbol{\Sigma}_b^{(s)-1} \boldsymbol{\mu}_b^{(s)}) \right] \end{aligned}$$

and variance-covariance matrix

$$\begin{aligned}\check{\Sigma}_{\mathbf{b}_i}^{(s)} &\equiv \begin{pmatrix} \check{\sigma}_{\mathbf{b}_i,1}^{2(s)} & \check{\sigma}_{\mathbf{b}_i,12}^{(s)} & \cdots & \check{\sigma}_{\mathbf{b}_i,1p}^{(s)} \\ \check{\sigma}_{\mathbf{b}_i,12}^{(s)} & \check{\sigma}_{\mathbf{b}_i,2}^{2(s)} & \cdots & \check{\sigma}_{\mathbf{b}_i,2p}^{(s)} \\ \vdots & \vdots & \ddots & \vdots \\ \check{\sigma}_{\mathbf{b}_i,1p}^{(s)} & \check{\sigma}_{\mathbf{b}_i,2p}^{(s)} & \cdots & \check{\sigma}_{\mathbf{b}_i,p}^{2(s)} \end{pmatrix} \\ &= \left( \Sigma_b^{(s)-1} + t_{im_i} \mathbf{D}^{(s)-1} + \Sigma_b^{(s)-1} \Sigma_{ba}^{(s)} \Sigma_{Y_{i(0)}|\mathbf{b}_i}^{(s)-1} \Sigma_{ab}^{(s)} \Sigma_b^{(s)-1} \right)^{-1},\end{aligned}$$

where  $\mathbf{y}_{im_i} - \mathbf{y}_{i0} = \sum_{k=1}^{m_i} \tilde{\mathbf{y}}_{ik}$ ,  $t_{im_i} = \sum_{k=1}^{m_i} \tilde{\mathbf{t}}_{ik}$ , and  $\Sigma_{Y_{i(0)}|\mathbf{b}_i}^{(s)} = \hat{\Sigma}_a - \Sigma_{ab}^{(s)} \Sigma_b^{(s)-1} \Sigma_{ba}^{(s)}$ . Here, the conclusion implied by Equation (8) is generalized to the case of multiple measurements. Obviously, due to the Markovian property, only the up-to-date information (i.e.,  $\mathbf{y}_{i0}$ ,  $\mathbf{y}_{im_i} - \mathbf{y}_{i0}$ , and  $t_{im_i}$ ) is needed to calculate  $\check{\boldsymbol{\mu}}_{\mathbf{b}_i}^{(s)}$  and  $\check{\Sigma}_{\mathbf{b}_i}^{(s)}$ . Then, given Lemma 3, we know

$$\begin{aligned}\mathbb{E}_{\mathbf{b}_i|\mathbf{y}_{i0}, \tilde{\mathbf{y}}_i, \tilde{\mathbf{t}}_i, \boldsymbol{\theta}^{(s)}}[b_{ij}] &= \check{\mu}_{\mathbf{b}_i,j}^{(s)}, \quad \mathbb{E}_{\mathbf{b}_i|\mathbf{y}_{i0}, \tilde{\mathbf{y}}_i, \tilde{\mathbf{t}}_i, \boldsymbol{\theta}^{(s)}}[b_{ij}^2] = \left(\check{\mu}_{\mathbf{b}_i,j}^{(s)}\right)^2 + \check{\sigma}_{\mathbf{b}_i,j}^{2(s)}, \text{ and} \\ \mathbb{E}_{\mathbf{b}_i|\mathbf{y}_{i0}, \tilde{\mathbf{y}}_i, \tilde{\mathbf{t}}_i, \boldsymbol{\theta}^{(s)}}\left[\left(\mathbf{b}_i - \boldsymbol{\mu}_{\mathbf{b}_i|\mathbf{y}_{i0}}\right)' \Sigma_{\mathbf{b}_i|\mathbf{y}_{i0}}^{-1} \left(\mathbf{b}_i - \boldsymbol{\mu}_{\mathbf{b}_i|\mathbf{y}_{i0}}\right)\right] &= \text{tr}\left(\Sigma_{\mathbf{b}_i|\mathbf{y}_{i0}}^{-1} \check{\Sigma}_{\mathbf{b}_i}^{(s)}\right) + \left(\check{\boldsymbol{\mu}}_{\mathbf{b}_i}^{(s)} - \boldsymbol{\mu}_{\mathbf{b}_i|\mathbf{y}_{i0}}\right)' \Sigma_{\mathbf{b}_i|\mathbf{y}_{i0}}^{-1} \left(\check{\boldsymbol{\mu}}_{\mathbf{b}_i}^{(s)} - \boldsymbol{\mu}_{\mathbf{b}_i|\mathbf{y}_{i0}}\right).\end{aligned}$$

Therefore,  $Q\left(\boldsymbol{\theta}|\boldsymbol{\theta}^{(s)}\right)$  is shown as

$$\begin{aligned}Q\left(\boldsymbol{\theta}|\boldsymbol{\theta}^{(s)}\right) &= -\frac{1}{2} \left\{ \sum_{i=1}^n \sum_{j=1}^p \sum_{k=1}^{m_i} \left[ \ln\left(\tilde{\mathbf{t}}_{ik} \sigma_j^2\right) + \frac{\left(\check{\mu}_{\mathbf{b}_i,j}^{(s)}\right)^2 + \check{\sigma}_{\mathbf{b}_i,j}^{2(s)} - 2\tilde{\mathbf{y}}_{ijk} \check{\mu}_{\mathbf{b}_i,j}^{(s)} / \tilde{\mathbf{t}}_{ik} + \tilde{\mathbf{y}}_{ijk}^2 / \tilde{\mathbf{t}}_{ik}^2}{\sigma_j^2 / \tilde{\mathbf{t}}_{ik}} \right] + \right. \\ &\quad \sum_{i=1}^n \left[ \ln\left|\Sigma_b - \Sigma_{ba} \hat{\Sigma}_a^{-1} \Sigma_{ab}\right| + \text{tr}\left(\left(\Sigma_b - \Sigma_{ba} \hat{\Sigma}_a^{-1} \Sigma_{ab}\right)^{-1} \check{\Sigma}_{\mathbf{b}_i}^{(s)}\right) + \right. \\ &\quad \left. \left(\check{\boldsymbol{\mu}}_{\mathbf{b}_i}^{(s)} - \boldsymbol{\mu}_b - \Sigma_{ba} \hat{\Sigma}_a^{-1} (\mathbf{y}_{i0} - \hat{\boldsymbol{\mu}}_a)\right)' \left(\Sigma_b - \Sigma_{ba} \hat{\Sigma}_a^{-1} \Sigma_{ab}\right)^{-1} \left(\check{\boldsymbol{\mu}}_{\mathbf{b}_i}^{(s)} - \boldsymbol{\mu}_b - \Sigma_{ba} \hat{\Sigma}_a^{-1} (\mathbf{y}_{i0} - \hat{\boldsymbol{\mu}}_a)\right) \right] + \\ &\quad \left. \sum_{i=1}^n \left[ \ln\left|\hat{\Sigma}_a\right| + (\mathbf{y}_{i0} - \hat{\boldsymbol{\mu}}_a)' \hat{\Sigma}_a^{-1} (\mathbf{y}_{i0} - \hat{\boldsymbol{\mu}}_a) \right] \right\}.\end{aligned}$$

- M-step: In this step, we update the parameter estimates by solving the equations that set the first derivative of  $Q\left(\boldsymbol{\theta}|\boldsymbol{\theta}^{(s)}\right)$  equal to 0. Particularly, the derivative with respect to  $\Sigma_{ab}$  results in a complex cubic matrix-wise equation that is prohibitively hard to solve. To reduce the complexity and also facilitate the computation,  $\Sigma_{\mathbf{b}_i|\mathbf{y}_{i0}}$  (i.e.,  $\Sigma_b - \Sigma_{ba} \hat{\Sigma}_a^{-1} \Sigma_{ab}$ ) is considered as a fixed part when updating  $\Sigma_{ab}^{(s+1)}$ . Then,  $\Sigma_b^{(s+1)}$  can be easily updated given the known  $\Sigma_{ab}^{(s+1)}$ . After some manipulations based on matrix calculus, the result

is given by

$$\begin{aligned}
\boldsymbol{\mu}_b^{(s+1)} &= \frac{1}{n} \sum_{i=1}^n \check{\boldsymbol{\mu}}_{b_i}^{(s)}, \\
\boldsymbol{\Sigma}_{ab}^{(s+1)} &= \frac{1}{n-1} \sum_{i=1}^n (\mathbf{y}_{i0} - \hat{\boldsymbol{\mu}}_a) \left( \check{\boldsymbol{\mu}}_{b_i}^{(s)} - \boldsymbol{\mu}_b^{(s+1)} \right)', \\
\boldsymbol{\Sigma}_b^{(s+1)} &= \boldsymbol{\Sigma}_{ba}^{(s+1)} \hat{\boldsymbol{\Sigma}}_a^{-1} \boldsymbol{\Sigma}_{ab}^{(s+1)} + \frac{1}{n} \sum_{i=1}^n \left\{ \check{\boldsymbol{\Sigma}}_{b_i}^{(s)} + \right. \\
&\quad \left. \left[ \check{\boldsymbol{\mu}}_{b_i}^{(s)} - \boldsymbol{\mu}_b^{(s+1)} - \boldsymbol{\Sigma}_{ba}^{(s+1)} \hat{\boldsymbol{\Sigma}}_a^{-1} (\mathbf{y}_{i0} - \hat{\boldsymbol{\mu}}_a) \right] \left[ \check{\boldsymbol{\mu}}_{b_i}^{(s)} - \boldsymbol{\mu}_b^{(s+1)} - \boldsymbol{\Sigma}_{ba}^{(s+1)} \hat{\boldsymbol{\Sigma}}_a^{-1} (\mathbf{y}_{i0} - \hat{\boldsymbol{\mu}}_a) \right]' \right\}, \text{ and} \\
\mathbf{D}^{(s+1)} &= \text{diag} \left( \sigma_1^{2(s+1)}, \sigma_2^{2(s+1)}, \dots, \sigma_p^{2(s+1)} \right), \\
\text{where } \sigma_j^{2(s+1)} &= \frac{\sum_{i=1}^n \sum_{k=1}^{m_i} \left[ \check{\mathbf{t}}_{ik} \left( \check{\boldsymbol{\mu}}_{b_i,j}^{(s)} \right)^2 + \check{\mathbf{t}}_{ik} \check{\sigma}_{b_i,j}^{2(s)} - 2\check{y}_{ijk} \check{\boldsymbol{\mu}}_{b_i,j}^{(s)} + \check{y}_{ijk}^2 / \check{\mathbf{t}}_{ik} \right]}{\sum_{i=1}^n m_i}.
\end{aligned}$$

## D.2 Inference Procedure Adapted to the Special Model Variants

❶ Firstly, recall that models  $M_1$  and  $M_2$  have the structures of random effects as follows:

$$\begin{aligned}
M_1 : \begin{pmatrix} \mathbf{Y}_{i(0)} \\ \mathbf{b}_i \end{pmatrix} &\sim \mathcal{MVN} \left( \begin{bmatrix} \boldsymbol{\mu}_a \\ \boldsymbol{\mu}_b \end{bmatrix}, \begin{bmatrix} \boldsymbol{\Sigma}_a & \mathbf{0} \\ \mathbf{0} & \boldsymbol{\Sigma}_b \end{bmatrix} \right), \\
M_2 : \mathbf{b}_i &\sim \mathcal{MVN}(\boldsymbol{\mu}_b, \boldsymbol{\Sigma}_b).
\end{aligned}$$

One can see that the two models are very alike, except model  $M_2$  excludes the random effect of the initial degradation levels. So we provide the inference procedure for model  $M_1$  as an exemplar, while the one for  $M_2$  can be found analogously. Since model  $M_1$  assumes  $\boldsymbol{\Sigma}_{ab}$  is a null matrix, the total log-likelihood function for the complete data reduces to

$$\ell(\boldsymbol{\theta}; \mathbb{Y}_0, \mathbb{D}, \mathbf{b}) = \ell(\mathbf{D}; \mathbb{D} \mid \mathbf{b}) + \ell(\boldsymbol{\mu}_b, \boldsymbol{\Sigma}_b; \mathbf{b}) + \ell(\boldsymbol{\mu}_a, \boldsymbol{\Sigma}_a; \mathbb{Y}_0),$$

where

$$\begin{aligned}
\ell(\mathbf{D}; \mathbb{D} \mid \mathbf{b}) &= -\frac{1}{2} \sum_{i=1}^n \sum_{j=1}^p \sum_{k=1}^{m_i} \left[ \ln \left( \check{\mathbf{t}}_{ik} \sigma_j^2 \right) + \frac{(\check{y}_{ijk} - \check{\mathbf{t}}_{ik} b_{ij})^2}{\check{\mathbf{t}}_{ik} \sigma_j^2} \right], \\
\ell(\boldsymbol{\mu}_b, \boldsymbol{\Sigma}_b; \mathbf{b}) &= -\frac{1}{2} \sum_{i=1}^n \left[ \ln |\boldsymbol{\Sigma}_b| + (\mathbf{b}_i - \boldsymbol{\mu}_b)' \boldsymbol{\Sigma}_b^{-1} (\mathbf{b}_i - \boldsymbol{\mu}_b) \right], \text{ and} \\
\ell(\boldsymbol{\mu}_a, \boldsymbol{\Sigma}_a; \mathbb{Y}_0) &= -\frac{1}{2} \sum_{i=1}^n \left[ \ln |\boldsymbol{\Sigma}_a| + (\mathbf{y}_{i0} - \boldsymbol{\mu}_a)' \boldsymbol{\Sigma}_a^{-1} (\mathbf{y}_{i0} - \boldsymbol{\mu}_a) \right].
\end{aligned}$$

Again, it is immediate to get the estimates of  $\boldsymbol{\mu}_a$  and  $\boldsymbol{\Sigma}_a$ , which are given by

$$\hat{\boldsymbol{\mu}}_a = \frac{1}{n} \sum_{i=1}^n \mathbf{y}_{i0} \text{ and } \hat{\boldsymbol{\Sigma}}_a = \frac{1}{n-1} \sum_{i=1}^n (\mathbf{y}_{i0} - \hat{\boldsymbol{\mu}}_a) (\mathbf{y}_{i0} - \hat{\boldsymbol{\mu}}_a)'.$$

So the algorithm only needs to apply the iterative computation with respect to  $\ell(\mathbf{D}; \mathbb{D} \mid \mathbf{b})$  and  $\ell(\boldsymbol{\mu}_b, \boldsymbol{\Sigma}_b; \mathbf{b})$ . Given the current EM estimate  $\boldsymbol{\theta}^{(s)}$  consisting of  $\hat{\boldsymbol{\mu}}_a, \boldsymbol{\mu}_b^{(s)}, \hat{\boldsymbol{\Sigma}}_a, \boldsymbol{\Sigma}_b^{(s)}$ , and  $\mathbf{D}^{(s)}$ , the algorithm is performed according to the following steps:

- E-step: First, based on Equation (7),  $\mathbf{b} \mid \mathbb{D}, \boldsymbol{\theta}^{(s)}$  or concretely  $\mathbf{b}_i \mid \tilde{\mathbf{y}}_i, \tilde{\mathbf{t}}_i, \boldsymbol{\theta}^{(s)}$  is subject to a MVN distribution with mean vector

$$\begin{aligned} \check{\boldsymbol{\mu}}_{b_i}^{(s)} &\equiv \left( \check{\mu}_{b_i,1}^{(s)}, \check{\mu}_{b_i,2}^{(s)}, \dots, \check{\mu}_{b_i,p}^{(s)} \right)' \\ &= \left( \boldsymbol{\Sigma}_b^{(s)-1} + t_{im_i} \mathbf{D}^{(s)-1} \right)^{-1} \left( \boldsymbol{\Sigma}_b^{(s)-1} \boldsymbol{\mu}_b^{(s)} + \mathbf{D}^{(s)-1} (\mathbf{y}_{im_i} - \mathbf{y}_{i0}) \right) \end{aligned}$$

and variance-covariance matrix

$$\begin{aligned} \check{\boldsymbol{\Sigma}}_{b_i}^{(s)} &\equiv \begin{pmatrix} \check{\sigma}_{b_i,1}^{2(s)} & \check{\sigma}_{b_i,12}^{(s)} & \cdots & \check{\sigma}_{b_i,1p}^{(s)} \\ \check{\sigma}_{b_i,12}^{(s)} & \check{\sigma}_{b_i,2}^{2(s)} & \cdots & \check{\sigma}_{b_i,2p}^{(s)} \\ \vdots & \vdots & \ddots & \vdots \\ \check{\sigma}_{b_i,1p}^{(s)} & \check{\sigma}_{b_i,2p}^{(s)} & \cdots & \check{\sigma}_{b_i,p}^{2(s)} \end{pmatrix} \\ &= \left( \boldsymbol{\Sigma}_b^{(s)-1} + t_{im_i} \mathbf{D}^{(s)-1} \right)^{-1}, \end{aligned}$$

where  $\mathbf{y}_{im_i} - \mathbf{y}_{i0} = \sum_{k=1}^{m_i} \tilde{\mathbf{y}}_{ik}$  and  $t_{im_i} = \sum_{k=1}^{m_i} \tilde{\mathbf{t}}_{ik}$ . Here, the conclusion implied by Equation (7) is generalized to the case that multiple measurements are taken. Obviously, due to the Markovian property, only the up-to-date information is needed to calculate  $\check{\boldsymbol{\mu}}_{b_i}^{(s)}$  and  $\check{\boldsymbol{\Sigma}}_{b_i}^{(s)}$ . Then, given Lemma 3, we know

$$\begin{aligned} \mathbb{E}_{b_i \mid \tilde{\mathbf{y}}_i, \tilde{\mathbf{t}}_i, \boldsymbol{\theta}^{(s)}} [b_{ij}] &= \check{\mu}_{b_i,j}^{(s)}, \quad \mathbb{E}_{b_i \mid \tilde{\mathbf{y}}_i, \tilde{\mathbf{t}}_i, \boldsymbol{\theta}^{(s)}} [b_{ij}^2] = \left( \check{\mu}_{b_i,j}^{(s)} \right)^2 + \check{\sigma}_{b_i,j}^{2(s)}, \text{ and} \\ \mathbb{E}_{b_i \mid \tilde{\mathbf{y}}_i, \tilde{\mathbf{t}}_i, \boldsymbol{\theta}^{(s)}} \left[ (\mathbf{b}_i - \boldsymbol{\mu}_b)' \boldsymbol{\Sigma}_b^{-1} (\mathbf{b}_i - \boldsymbol{\mu}_b) \right] &= \text{tr} \left( \boldsymbol{\Sigma}_b^{-1} \check{\boldsymbol{\Sigma}}_{b_i}^{(s)} \right) + \left( \check{\boldsymbol{\mu}}_{b_i}^{(s)} - \boldsymbol{\mu}_b \right)' \boldsymbol{\Sigma}_b^{-1} \left( \check{\boldsymbol{\mu}}_{b_i}^{(s)} - \boldsymbol{\mu}_b \right). \end{aligned}$$



Therefore,  $Q(\boldsymbol{\theta}|\boldsymbol{\theta}^{(s)})$  is shown as

$$\begin{aligned} Q(\boldsymbol{\theta}|\boldsymbol{\theta}^{(s)}) = & -\frac{1}{2} \left\{ \sum_{i=1}^n \sum_{j=1}^p \sum_{k=1}^{m_i} \left[ \ln(\tilde{\mathbf{t}}_{ik} \sigma_j^2) + \frac{(\check{\boldsymbol{\mu}}_{\mathbf{b}_i,j}^{(s)})^2 + \check{\sigma}_{\mathbf{b}_i,j}^{2(s)} - 2\tilde{\mathbf{y}}_{ijk} \check{\boldsymbol{\mu}}_{\mathbf{b}_i,j}^{(s)} / \tilde{\mathbf{t}}_{ik} + \tilde{\mathbf{y}}_{ijk}^2 / \tilde{\mathbf{t}}_{ik}^2}{\sigma_j^2 / \tilde{\mathbf{t}}_{ik}} \right] + \right. \\ & \sum_{i=1}^n \left[ \ln|\boldsymbol{\Sigma}_b| + \text{tr}(\boldsymbol{\Sigma}_b^{-1} \check{\boldsymbol{\Sigma}}_{\mathbf{b}_i}^{(s)}) + (\check{\boldsymbol{\mu}}_{\mathbf{b}_i}^{(s)} - \boldsymbol{\mu}_b)' \boldsymbol{\Sigma}_b^{-1} (\check{\boldsymbol{\mu}}_{\mathbf{b}_i}^{(s)} - \boldsymbol{\mu}_b) \right] + \\ & \left. \sum_{i=1}^n \left[ \ln|\hat{\boldsymbol{\Sigma}}_a| + (\mathbf{y}_{i0} - \hat{\boldsymbol{\mu}}_a)' \hat{\boldsymbol{\Sigma}}_a^{-1} (\mathbf{y}_{i0} - \hat{\boldsymbol{\mu}}_a) \right] \right\}. \end{aligned}$$

- M-step: In this step, we update the estimated parameters by solving the equations that set the first derivative of  $Q(\boldsymbol{\theta}|\boldsymbol{\theta}^{(s)})$  equal to 0. And based on some existing properties of matrix algebra, the result is given by

$$\begin{aligned} \boldsymbol{\mu}_b^{(s+1)} &= \frac{1}{n} \sum_{i=1}^n \check{\boldsymbol{\mu}}_{\mathbf{b}_i}^{(s)}, \\ \boldsymbol{\Sigma}_b^{(s+1)} &= \frac{1}{n} \sum_{i=1}^n \left[ \check{\boldsymbol{\Sigma}}_{\mathbf{b}_i}^{(s)} + (\check{\boldsymbol{\mu}}_{\mathbf{b}_i}^{(s)} - \boldsymbol{\mu}_b^{(s+1)}) (\check{\boldsymbol{\mu}}_{\mathbf{b}_i}^{(s)} - \boldsymbol{\mu}_b^{(s+1)})' \right], \text{ and} \\ \mathbf{D}^{(s+1)} &= \text{diag}(\sigma_1^{2(s+1)}, \sigma_2^{2(s+1)}, \dots, \sigma_p^{2(s+1)}), \end{aligned}$$

where

$$\sigma_j^{2(s+1)} = \frac{\sum_{i=1}^n \sum_{k=1}^{m_i} \left[ \tilde{\mathbf{t}}_{ik} (\check{\boldsymbol{\mu}}_{\mathbf{b}_i,j}^{(s)})^2 + \tilde{\mathbf{t}}_{ik} \check{\sigma}_{\mathbf{b}_i,j}^{2(s)} - 2\tilde{\mathbf{y}}_{ijk} \check{\boldsymbol{\mu}}_{\mathbf{b}_i,j}^{(s)} + \tilde{\mathbf{y}}_{ijk}^2 / \tilde{\mathbf{t}}_{ik} \right]}{\sum_{i=1}^n m_i}.$$

② Now, recall that model  $M_3$  is given by

$$M_3 : \begin{cases} Y_{ij}(t) = Y_{ij}(0) + b_{ij}t + \sigma_j \mathcal{B}(t) \\ \begin{pmatrix} Y_{ij}(0) \\ b_{ij} \end{pmatrix} \sim \mathcal{BVN} \left( \begin{bmatrix} \mu_{aj} \\ \mu_{bj} \end{bmatrix}, \begin{bmatrix} \sigma_{aj}^2 & \rho_j^{ab} \sigma_{aj} \sigma_{bj} \\ \rho_j^{ab} \sigma_{aj} \sigma_{bj} & \sigma_{bj}^2 \end{bmatrix} \right). \end{cases}$$

Since PC-wise dependency is absent, we only need to demonstrate the inference procedure for marginal processes; and it is common for all individuals. For notational convenience, we drop the subscript  $j$ . Then, the set of the unknown parameters is  $\boldsymbol{\theta} = (\mu_a, \mu_b, \sigma_a^2, \sigma_b^2, \rho_{ab}, \sigma^2)'$ . And the complete data becomes  $\{\mathbb{Y}_0, \mathbb{D}, \mathbf{b}\}$ , where  $\mathbb{Y}_0 = (y_{10}, y_{20}, \dots, y_{n0})'$ ,  $\mathbb{D} = \{\tilde{\mathbf{y}}_1, \tilde{\mathbf{y}}_2, \dots, \tilde{\mathbf{y}}_n, \tilde{\mathbf{t}}_1, \tilde{\mathbf{t}}_2, \dots, \tilde{\mathbf{t}}_n\}$ ,  $\tilde{\mathbf{y}}_i = (\tilde{y}_{i1}, \tilde{y}_{i2}, \dots, \tilde{y}_{im_i})'$ , and  $\mathbf{b} =$

$(b_1, b_2, \dots, b_n)'$ . Under this scenario, the total log-likelihood function is given by

$$\ell(\boldsymbol{\theta}; \mathbb{Y}_0, \mathbb{D}, \mathbf{b}) = \ell(\sigma^2; \mathbb{D} \mid \mathbf{b}) + \ell(\mu_a, \mu_b, \sigma_a^2, \sigma_b^2, \rho_{ab}; \mathbf{b} \mid \mathbb{Y}_0) + \ell(\mu_a, \sigma_a^2; \mathbb{Y}_0),$$

where

$$\begin{aligned} \ell(\sigma^2; \mathbb{D} \mid \mathbf{b}) &= -\frac{1}{2} \sum_{i=1}^n \sum_{k=1}^{m_i} \left[ \ln(\tilde{\mathbf{t}}_{ik} \sigma^2) + \frac{(\tilde{y}_{ik} - \tilde{\mathbf{t}}_{ik} b_i)^2}{\tilde{\mathbf{t}}_{ik} \sigma^2} \right], \\ \ell(\mu_a, \mu_b, \sigma_a^2, \sigma_b^2, \rho_{ab}; \mathbf{b} \mid \mathbb{Y}_0) &= -\frac{1}{2} \sum_{i=1}^n \left[ \ln[(1 - \rho_{ab}^2) \sigma_b^2] + \frac{\left[ b_i - \mu_b - \frac{\sigma_b}{\sigma_a} \rho_{ab} (y_{i0} - \mu_a) \right]^2}{(1 - \rho_{ab}^2) \sigma_b^2} \right], \text{ and} \\ \ell(\mu_a, \sigma_a^2; \mathbb{Y}_0) &= -\frac{1}{2} \sum_{i=1}^n \left[ \ln(\sigma_a^2) + \frac{(y_{i0} - \mu_a)^2}{\sigma_a^2} \right]. \end{aligned}$$

Analogously, it is immediate to get the estimates of  $\mu_a$  and  $\sigma_a^2$ , which are given by

$$\hat{\mu}_a = \frac{1}{n} \sum_{i=1}^n y_{i0} \text{ and } \hat{\sigma}_a^2 = \frac{1}{n-1} \sum_{i=1}^n (y_{i0} - \hat{\mu}_a)^2.$$

So the algorithm only needs to deal with  $\ell(\sigma^2; \mathbb{D} \mid \mathbf{b})$  and  $\ell(\mu_a, \mu_b, \sigma_a^2, \sigma_b^2, \rho_{ab}; \mathbf{b} \mid \mathbb{Y}_0)$  iteratively. Given the current EM estimate  $\boldsymbol{\theta}^{(s)}$ , the algorithm is performed as follows:

- E-step: First, based on the conclusion provided by Supplementary Section C,  $b_i | y_{i0}, \tilde{\mathbf{y}}_i, \tilde{\mathbf{t}}_i, \boldsymbol{\theta}^{(s)}$  is subject to a normal distribution with mean

$$\begin{aligned} \check{\mu}_{b_i}^{(s)} &= \left[ \frac{1}{\sigma_b^{2(s)}} + \frac{t_{im_i}}{\sigma^{2(s)}} + \frac{(\rho_{ab}^{(s)})^2}{\sigma_b^{2(s)} [1 - (\rho_{ab}^{(s)})^2]} \right]^{-1} \times \\ &\quad \left[ \frac{\mu_b^{(s)}}{\sigma_b^{2(s)}} + \frac{y_{im_i} - y_{i0}}{\sigma^{2(s)}} + \frac{\rho_{ab}^{(s)} \left( y_{i0} - \hat{\mu}_a + \frac{\hat{\sigma}_a}{\sigma_b^{(s)}} \rho_{ab}^{(s)} \mu_b^{(s)} \right)}{[1 - (\rho_{ab}^{(s)})^2] \hat{\sigma}_a \sigma_b^{(s)}} \right] \end{aligned}$$

and variance

$$\check{\sigma}_{b_i}^{2(s)} = \left[ \frac{1}{\sigma_b^{2(s)}} + \frac{t_{im_i}}{\sigma^{2(s)}} + \frac{(\rho_{ab}^{(s)})^2}{\sigma_b^{2(s)} [1 - (\rho_{ab}^{(s)})^2]} \right]^{-1},$$

where  $y_{im_i} - y_{i0} = \sum_{k=1}^{m_i} \tilde{y}_{ik}$  and  $t_{im_i} = \sum_{k=1}^{m_i} \tilde{\mathbf{t}}_{ik}$ . Again, the Markovian property applies

here. Then, we know that

$$\mathbb{E}_{b_i|y_{i0}, \tilde{\mathbf{y}}_i, \tilde{\mathbf{t}}_i, \boldsymbol{\theta}^{(s)}}[b_i] = \check{\mu}_{b_i}^{(s)} \text{ and } \mathbb{E}_{b_i|y_{i0}, \tilde{\mathbf{y}}_i, \tilde{\mathbf{t}}_i, \boldsymbol{\theta}^{(s)}}[b_i^2] = \left(\check{\mu}_{b_i}^{(s)}\right)^2 + \check{\sigma}_{b_i}^{2(s)}.$$

Therefore,  $Q(\boldsymbol{\theta}|\boldsymbol{\theta}^{(s)})$  is shown as

$$\begin{aligned} Q(\boldsymbol{\theta}|\boldsymbol{\theta}^{(s)}) = & -\frac{1}{2} \left\{ \sum_{i=1}^n \sum_{k=1}^{m_i} \left[ \ln(\tilde{t}_{ik} \sigma^2) + \frac{\left(\check{\mu}_{b_i}^{(s)}\right)^2 + \check{\sigma}_{b_i}^{2(s)} - 2\tilde{y}_{ik}\check{\mu}_{b_i}^{(s)}/\tilde{t}_{ik} + \tilde{y}_{ik}^2/\tilde{t}_{ik}^2}{\sigma^2/\tilde{t}_{ik}} \right] + \right. \\ & \sum_{i=1}^n \left[ \ln\left[(1 - \rho_{ab}^2) \sigma_b^2\right] + \frac{\left(\check{\mu}_{b_i}^{(s)}\right)^2 + \check{\sigma}_{b_i}^{2(s)} - 2\left[\mu_b + \frac{\sigma_b}{\hat{\sigma}_a} \rho_{ab}(y_{i0} - \hat{\mu}_a)\right]\check{\mu}_{b_i}^{(s)} + \left[\mu_b + \frac{\sigma_b}{\hat{\sigma}_a} \rho_{ab}(y_{i0} - \hat{\mu}_a)\right]^2}{(1 - \rho_{ab}^2) \sigma_b^2} \right] + \\ & \left. \sum_{i=1}^n \left[ \ln(\hat{\sigma}_a^2) + \frac{(y_{i0} - \hat{\mu}_a)^2}{\hat{\sigma}_a^2} \right] \right\}. \end{aligned}$$

- M-step: In this step, we update the parameter estimates by solving the equations that set the first derivative of  $Q(\boldsymbol{\theta}|\boldsymbol{\theta}^{(s)})$  equal to 0. After some manipulations based on calculus, the result is given by

$$\begin{aligned} \mu_b^{(s+1)} &= \frac{1}{n} \sum_{i=1}^n \check{\mu}_{b_i}^{(s)}, \\ \sigma_{ab}^{(s+1)} &= \frac{1}{n-1} \sum_{i=1}^n (y_{i0} - \hat{\mu}_a) \left( \check{\mu}_{b_i}^{(s)} - \mu_b^{(s+1)} \right), \\ \sigma_b^{2(s+1)} &= \left( \frac{\sigma_{ab}^{(s+1)}}{\hat{\sigma}_a} \right)^2 + \frac{1}{n} \sum_{i=1}^n \left\{ \check{\sigma}_{b_i}^{2(s)} + \left[ \check{\mu}_{b_i}^{(s)} - \mu_b^{(s+1)} - \frac{\sigma_{ab}^{(s+1)}}{\hat{\sigma}_a^2} (y_{i0} - \hat{\mu}_a) \right]^2 \right\}, \text{ and} \\ \sigma^{2(s+1)} &= \frac{\sum_{i=1}^n \sum_{k=1}^{m_i} \left[ \tilde{t}_{ik} \left( \check{\mu}_{b_i}^{(s)} \right)^2 + \tilde{t}_{ik} \check{\sigma}_{b_i}^{2(s)} - 2\tilde{y}_{ik} \check{\mu}_{b_i}^{(s)} + \tilde{y}_{ik}^2 / \tilde{t}_{ik} \right]}{\sum_{i=1}^n m_i}, \end{aligned}$$

where  $\sigma_{ab}^{(s+1)}$  and  $\sigma_b^{2(s+1)}$  are updated after reparameterizing  $\rho_{ab}\sigma_b$  as  $\sigma_{ab}/\hat{\sigma}_a$  in the  $Q$ -function. In such case,  $\rho_{ab}^{(s+1)} = \sigma_{ab}^{(s+1)} / (\hat{\sigma}_a \sigma_b^{(s+1)})$ . The result also mirrors the conclusion regarding model  $M_0$  in a multivariate setting.

- ③ Lastly, recall that model  $M_4$  is given by

$$M_4 : \begin{cases} Y_{ij}(t) = \mu_{aj}a_i + \mu_{bj}b_it + \sigma_j\mathcal{B}(t) \\ \begin{pmatrix} a_i \\ b_i \end{pmatrix} \sim \mathcal{BVN} \left( \begin{bmatrix} 1 \\ 1 \end{bmatrix}, \begin{bmatrix} \sigma_a^2 & \rho_{ab}\sigma_a\sigma_b \\ \rho_{ab}\sigma_a\sigma_b & \sigma_b^2 \end{bmatrix} \right), \end{cases}$$

for which the set of all the unknown parameters is  $\boldsymbol{\theta} = \{\boldsymbol{\mu}_a, \boldsymbol{\mu}_b, \sigma_a, \sigma_b, \rho_{ab}, \mathbf{D}\}$ . Under this scenario, the total log-likelihood function for the complete data  $\{\mathbb{Y}_0, \mathbb{D}, \mathbf{b}\}$ , where  $\mathbf{b} = (b_1, b_2, \dots, b_n)'$  instead, turns into

$$\ell(\boldsymbol{\theta}; \mathbb{Y}_0, \mathbb{D}, \mathbf{b}) = \ell(\boldsymbol{\mu}_b, \mathbf{D}; \mathbb{D} \mid \mathbf{b}) + \ell(\boldsymbol{\mu}_a, \sigma_a, \sigma_b, \rho_{ab}; \mathbf{b} \mid \mathbb{Y}_0) + \ell(\boldsymbol{\mu}_a, \sigma_a; \mathbb{Y}_0),$$

where

$$\begin{aligned} \ell(\boldsymbol{\mu}_b, \mathbf{D}; \mathbb{D} \mid \mathbf{b}) &= -\frac{1}{2} \sum_{i=1}^n \sum_{j=1}^p \sum_{k=1}^{m_i} \left[ \ln(\tilde{\mathbf{t}}_{ik} \sigma_j^2) + \frac{(\tilde{y}_{ijk} - \tilde{\mathbf{t}}_{ik} \mu_{bj} b_i)^2}{\tilde{\mathbf{t}}_{ik} \sigma_j^2} \right], \\ \ell(\boldsymbol{\mu}_a, \sigma_a, \sigma_b, \rho_{ab}; \mathbf{b} \mid \mathbb{Y}_0) &= -\frac{1}{2} \sum_{i=1}^n \sum_{j=1}^p \left\{ \ln[(1 - \rho_{ab}^2) \sigma_b^2] + \frac{[b_i - 1 - \frac{\sigma_b}{\sigma_a} \rho_{ab} (\frac{y_{ij0}}{\mu_{aj}} - 1)]^2}{(1 - \rho_{ab}^2) \sigma_b^2} \right\}, \text{ and} \\ \ell(\boldsymbol{\mu}_a, \sigma_a; \mathbb{Y}_0) &= -\frac{1}{2} \sum_{i=1}^n \sum_{j=1}^p \left[ \ln(\mu_{aj}^2 \sigma_a^2) + \frac{(y_{ij0} - \mu_{aj})^2}{\mu_{aj}^2 \sigma_a^2} \right]. \end{aligned}$$

Firstly, regarding  $\ell(\boldsymbol{\mu}_a, \sigma_a; \mathbb{Y}_0)$ , the unbiased estimate of  $\sigma_a^2$  given  $\boldsymbol{\mu}_a$  is given by

$$\hat{\sigma}_a^2(\boldsymbol{\mu}_a) = \frac{1}{np - 1} \sum_{i=1}^n \sum_{j=1}^p \left( \frac{y_{ij0}}{\mu_{aj}} - 1 \right)^2.$$

This relation can be substituted into  $\ell(\boldsymbol{\mu}_a, \sigma_a; \mathbb{Y}_0)$  to obtain the profile likelihood of  $\boldsymbol{\mu}_a$ . Then,  $\hat{\boldsymbol{\mu}}_a$  can be easily solved by numerically maximizing the profile likelihood. In turn,  $\hat{\sigma}_a$  can be computed.

Given the current EM estimate  $\boldsymbol{\theta}^{(s)}$ , the algorithm is performed as follows:

- E-step: First, based on the conclusion provided by Supplementary Section C,  $b_i | \mathbf{y}_{i0}, \tilde{\mathbf{y}}_i, \tilde{\mathbf{t}}_i, \boldsymbol{\theta}^{(s)}$  is subject to a normal distribution with mean

$$\begin{aligned} \check{\mu}_{b_i}^{(s)} &= \left[ \frac{1}{\sigma_b^{2(s)}} + \sum_{j=1}^p \frac{t_{im_i} (\mu_{bj}^{(s)})^2}{\sigma_j^{2(s)}} + \frac{p (\rho_{ab}^{(s)})^2}{\sigma_b^{2(s)} [1 - (\rho_{ab}^{(s)})^2]} \right]^{-1} \times \\ &\quad \left[ \frac{1}{\sigma_b^{2(s)}} + \sum_{j=1}^p \frac{\mu_{bj}^{(s)} (y_{ijm_i} - y_{ij0})}{\sigma_j^{2(s)}} + \frac{\rho_{ab}^{(s)}}{\hat{\sigma}_a \sigma_b^{(s)} [1 - (\rho_{ab}^{(s)})^2]} \sum_{j=1}^p \left( \frac{y_{ij0}}{\hat{\mu}_{aj}} - 1 + \rho_{ab}^{(s)} \frac{\hat{\sigma}_a}{\sigma_b^{(s)}} \right) \right] \end{aligned}$$

and variance

$$\check{\sigma}_{b_i}^{2(s)} = \left[ \frac{1}{\sigma_b^{2(s)}} + \sum_{j=1}^p \frac{t_{im_i} \left( \mu_{bj}^{(s)} \right)^2}{\sigma_j^{2(s)}} + \frac{p \left( \rho_{ab}^{(s)} \right)^2}{\sigma_b^{2(s)} \left[ 1 - \left( \rho_{ab}^{(s)} \right)^2 \right]} \right]^{-1},$$

where  $y_{ijm_i} - y_{ij0} = \sum_{k=1}^{m_i} \tilde{y}_{ijk}$  and  $t_{im_i} = \sum_{k=1}^{m_i} \tilde{t}_{ik}$ . Again, the Markovian property applies here. Then, we know that

$$\mathbb{E}_{b_i | \mathbf{y}_{i0}, \tilde{\mathbf{y}}_i, \tilde{\mathbf{t}}_i, \boldsymbol{\theta}^{(s)}}[b_i] = \check{\mu}_{b_i}^{(s)} \text{ and } \mathbb{E}_{b_i | \mathbf{y}_{i0}, \tilde{\mathbf{y}}_i, \tilde{\mathbf{t}}_i, \boldsymbol{\theta}^{(s)}}[b_i^2] = \left( \check{\mu}_{b_i}^{(s)} \right)^2 + \check{\sigma}_{b_i}^{2(s)}.$$

Therefore,  $Q(\boldsymbol{\theta} | \boldsymbol{\theta}^{(s)})$  is shown as

$$\begin{aligned} Q(\boldsymbol{\theta} | \boldsymbol{\theta}^{(s)}) = & -\frac{1}{2} \left\{ \sum_{i=1}^n \sum_{j=1}^p \sum_{k=1}^{m_i} \left[ \ln \left( \tilde{t}_{ik} \sigma_j^2 \right) + \frac{\left( \check{\mu}_{b_i}^{(s)} \right)^2 + \check{\sigma}_{b_i}^{2(s)} - 2\tilde{y}_{ijk} \check{\mu}_{b_i}^{(s)} / (\tilde{t}_{ik} \mu_{bj}) + \tilde{y}_{ijk}^2 / (\tilde{t}_{ik}^2 \mu_{bj}^2)}{\sigma_j^2 / (\tilde{t}_{ik} \mu_{bj}^2)} \right] + \right. \\ & \sum_{i=1}^n \sum_{j=1}^p \left[ \ln \left[ (1 - \rho_{ab}^2) \sigma_b^2 \right] + \frac{\left( \check{\mu}_{b_i}^{(s)} \right)^2 + \check{\sigma}_{b_i}^{2(s)} - 2 \left[ 1 + \frac{\sigma_b}{\sigma_a} \rho_{ab} \left( \frac{y_{ij0}}{\hat{\mu}_{aj}} - 1 \right) \right] \check{\mu}_{b_i}^{(s)} + \left[ 1 + \frac{\sigma_b}{\sigma_a} \rho_{ab} \left( \frac{y_{ij0}}{\hat{\mu}_{aj}} - 1 \right) \right]^2}{(1 - \rho_{ab}^2) \sigma_b^2} \right] + \\ & \left. \sum_{i=1}^n \sum_{j=1}^p \left[ \ln \left( \hat{\mu}_{aj}^2 \hat{\sigma}_a^2 \right) + \frac{(y_{ij0} - \hat{\mu}_{aj})^2}{\hat{\mu}_{aj}^2 \hat{\sigma}_a^2} \right] \right\}. \end{aligned}$$

- M-step: In this step, we update the parameter estimates by solving the equations that set the first derivative of  $Q(\boldsymbol{\theta} | \boldsymbol{\theta}^{(s)})$  equal to 0. After some manipulations based on calculus, the result is given by

$$\begin{aligned} \mu_{bj}^{(s+1)} &= \frac{\sum_{i=1}^n \check{\mu}_{b_i}^{(s)} (y_{ijm_i} - y_{ij0})}{\sum_{i=1}^n \left[ \left( \check{\mu}_{b_i}^{(s)} \right)^2 + \check{\sigma}_{b_i}^{2(s)} \right] t_{im_i}}, \\ \sigma_j^{2(s+1)} &= \frac{\sum_{i=1}^n \sum_{k=1}^{m_i} \left\{ \tilde{t}_{ik} \left( \mu_{bj}^{(s+1)} \right)^2 \left[ \left( \check{\mu}_{b_i}^{(s)} \right)^2 + \check{\sigma}_{b_i}^{2(s)} \right] - 2\tilde{y}_{ijk} \check{\mu}_{b_i}^{(s)} \mu_{bj}^{(s+1)} + \tilde{y}_{ijk}^2 / \tilde{t}_{ik} \right\}}{\sum_{i=1}^n m_i}, \\ \sigma_{ab}^{(s+1)} &= \frac{1}{np-1} \sum_{i=1}^n \sum_{j=1}^p \left( \frac{y_{ij0}}{\hat{\mu}_{aj}} - 1 \right) \left( \check{\mu}_{b_i}^{(s)} - 1 \right), \text{ and} \\ \sigma_b^{2(s+1)} &= \left( \frac{\sigma_{ab}^{(s+1)}}{\hat{\sigma}_a} \right)^2 + \frac{1}{np} \sum_{i=1}^n \sum_{j=1}^p \left\{ \check{\sigma}_{b_i}^{2(s)} + \left[ \check{\mu}_{b_i}^{(s)} - 1 - \frac{\sigma_{ab}^{(s+1)}}{\hat{\sigma}_a^2} \left( \frac{y_{ij0}}{\hat{\mu}_{aj}} - 1 \right) \right]^2 \right\}, \end{aligned}$$

where  $\sigma_{ab}^{(s+1)}$  and  $\sigma_b^{2(s+1)}$  are updated by making use of the same trick above.

### D.3 Consideration of Time Scale Transformation

With the consideration of time scale transformation, we denote the transformed time interval by  $\tau_{ijk} = \Lambda_j(t_{ik}) - \Lambda_j(t_{i,k-1})$ ,  $\forall i = 1, 2, \dots, n, j = 1, 2, \dots, p, k = 1, 2, \dots, m_i$ , with an unknown parameter  $\gamma_j$ . Note that in the decomposed log-likelihood functions, only  $\ell(\mathbf{D}; \mathbb{D} | \mathbf{b})$  involves the information of time intervals directly. Therefore, in the E-step, after updating  $\check{\mu}_{b_i}^{(s)}$  and  $\check{\Sigma}_{b_i}^{(s)}$  with  $\gamma_j^{(s)}$ ,  $\ell(\mathbf{D}; \mathbb{D} | \mathbf{b})$  in  $Q(\boldsymbol{\theta} | \boldsymbol{\theta}^{(s)})$  becomes

$$-\frac{1}{2} \sum_{i=1}^n \sum_{j=1}^p \sum_{k=1}^{m_i} \left[ \ln(\tau_{ijk} \sigma_j^2) + \frac{(\check{\mu}_{b_i,j}^{(s)})^2 + \check{\sigma}_{b_i,j}^{2(s)} - 2\check{y}_{ijk} \check{\mu}_{b_i,j}^{(s)} / \tau_{ijk} + \check{y}_{ijk}^2 / \tau_{ijk}^2}{\sigma_j^2 / \tau_{ijk}} \right].$$

Then, in the M-step,  $\gamma_j^{(s+1)}$  is equal to the solution of  $\gamma_j$  to the equation below:

$$\sum_{i=1}^n \sum_{k=1}^{m_i} \left\{ \frac{\tau'_{ijk}}{\tau_{ijk}} + \frac{\tau'_{ijk} \left[ (\check{\mu}_{b_i,j}^{(s)})^2 + \check{\sigma}_{b_i,j}^{2(s)} \right] - \check{y}_{ijk}^2 \tau'_{ijk} / \tau_{ijk}^2}{\sigma_j^{2(s+1)}} \right\} = 0.$$

In this paper, we make use of the power transformation, i.e.,  $\tau_{ijk} = t_{ik}^{\gamma_j} - t_{i,k-1}^{\gamma_j}$ . Thus,  $\tau'_{ijk}$  should be replaced with  $t_{ik}^{\gamma_j} \ln t_{ik} - t_{i,k-1}^{\gamma_j} \ln t_{i,k-1}$  in the equation above. Particularly, when  $t_{i,k-1} = 0$ , we set  $\tau_{ijk} = t_{ik}^{\gamma_j}$ . For models  $M_1$  to  $M_3$ , the estimate of the time scale transformation parameter is found similarly.

Specially, for model  $M_4$ ,  $\gamma_j^{(s+1)}$  is equal to the solution of  $\gamma_j$  to the equation below:

$$\sum_{i=1}^n \sum_{k=1}^{m_i} \left[ \frac{\tau'_{ijk}}{\tau_{ijk}} + \frac{\tau'_{ijk} (\mu_{bj}^{(s+1)})^2 \left[ (\check{\mu}_{b_i}^{(s)})^2 + \check{\sigma}_{b_i}^{2(s)} \right] - \check{y}_{ijk}^2 \tau'_{ijk} / \tau_{ijk}^2}{\sigma_j^{2(s+1)}} \right] = 0.$$

### D.4 Helpful Starting Values of Parameter Estimates

Recall that  $\hat{\mu}_a$  and  $\hat{\Sigma}_a$  are directly obtained by applying MLE on the log-likelihood function in terms of the data  $\mathbb{Y}_0$ . So there is no need to provide starting values for these two components. For the remaining terms, the following steps are performed:

1. Treat the degradation increments of each degradation path, i.e.,  $(\check{y}_{ij1}, \check{y}_{ij2}, \dots, \check{y}_{ijm_i})'$ ,  $\forall i = 1, 2, \dots, n, j = 1, 2, \dots, p$ , as an independent realization from a simple (non)linear Wiener process,  $\mathcal{N}(b_{ij}\Lambda_j(t), \sigma_{ij}^2\Lambda_j(t))$ . Fit the model to the data and obtain estimated parameters  $\hat{b}_{ij}$ ,  $\hat{\sigma}_{ij}^2$  and possibly  $\hat{\gamma}_{ij}$ ,  $\forall i = 1, 2, \dots, n, j = 1, 2, \dots, p$ .

2. Denote  $\hat{\mathbf{b}}_i = (\hat{b}_{i1}, \hat{b}_{i2}, \dots, \hat{b}_{ip})'$ ,  $\forall i = 1, 2, \dots, n$ , and compute

$$\sigma_j^{2(0)} = \frac{1}{n} \sum_{i=1}^n \hat{\sigma}_{ij}^2, \quad \boldsymbol{\mu}_b^{(0)} = \frac{1}{n} \sum_{i=1}^n \hat{\mathbf{b}}_i,$$

$$\boldsymbol{\Sigma}_b^{(0)} = \frac{1}{n-1} \sum_{i=1}^n (\hat{\mathbf{b}}_i - \boldsymbol{\mu}_b^{(0)}) (\hat{\mathbf{b}}_i - \boldsymbol{\mu}_b^{(0)})', \text{ and } \boldsymbol{\Sigma}_{ab}^{(0)} = \frac{1}{n-1} \sum_{i=1}^n (\mathbf{y}_{i0} - \hat{\boldsymbol{\mu}}_a) (\hat{\mathbf{b}}_i - \boldsymbol{\mu}_b^{(0)})'.$$

If nonlinearity exists,  $\gamma_j^{(0)} = \frac{1}{n} \sum_{i=1}^n \hat{\gamma}_{ij}$  needs also be computed. Then, set these calculated values as the initial parameter estimates and feed them into the E-step.

Specially, for model  $M_4$ ,  $\sigma_b^{2(0)}$  and  $\rho_{ab}^{(0)}$  are computed as

$$\sigma_b^{2(0)} = \frac{1}{np-1} \sum_{i=1}^n \sum_{j=1}^p \left( \frac{\hat{b}_{ij}}{\mu_{bj}^{(0)}} - 1 \right)^2 \text{ and } \rho_{ab}^{(0)} = \frac{1}{np-1} \sum_{i=1}^n \sum_{j=1}^p \left( \frac{y_{ij0}}{\hat{\mu}_{aj}} - 1 \right) \left( \frac{\hat{b}_{ij}}{\mu_{bj}^{(0)}} - 1 \right).$$

## E The BCp Bootstrap Method

For illustrative purposes, we use the BCp bootstrap method to demonstrate the computation of the C.I. for  $F_{T_{\mathcal{D}}}(t; \boldsymbol{\theta}, \mathcal{D})$  of the proposed model. It is performed according to the followings:

1. Given the observed data  $\mathbb{D}$ , implement the EM algorithm to obtain the parameter estimate  $\hat{\boldsymbol{\theta}}$  and calculate the estimated failure time probability  $\hat{F}_{T_{\mathcal{D}}}(t; \hat{\boldsymbol{\theta}}, \mathcal{D})$  (abbreviated  $\hat{F}(t)$ ) at desired values of  $t$ .
2. Generate a large number  $B$  (say  $B = 1,000$ ) of bootstrap samples that mimic the original sample and compute the corresponding bootstrap estimates  $\hat{F}_{T_{\mathcal{D}}}^*(t; \hat{\boldsymbol{\theta}}_b^*, \mathcal{D})_b$  (abbreviated  $\hat{F}^*(t)_b$ ),  $b = 1, 2, \dots, B$ , according to the following steps:
  - (a) Generate  $n$  simulated realizations from the random effects, i.e.,

$$\begin{pmatrix} \mathbf{Y}_i^{*(0)} \\ \mathbf{b}_i^* \end{pmatrix} \sim \mathcal{MVN} \left( \begin{bmatrix} \hat{\boldsymbol{\mu}}_a \\ \hat{\boldsymbol{\mu}}_b \end{bmatrix}, \begin{bmatrix} \hat{\boldsymbol{\Sigma}}_a & \hat{\boldsymbol{\Sigma}}_{ab} \\ \hat{\boldsymbol{\Sigma}}_{ba} & \hat{\boldsymbol{\Sigma}}_b \end{bmatrix} \right), \quad i = 1, 2, \dots, n.$$

- (b) For each pair of  $(y_{ij}^*(0), b_{ij}^*)$ , generate  $p$  simulated degradation paths based on  $y_{ijk}^* = y_{ij,k-1}^* + y_{ijk}^*$ ,  $\forall i = 1, 2, \dots, n$ ,  $j = 1, 2, \dots, p$ ,  $k = 1, 2, \dots, m_i$ , where  $y_{ij0}^* = y_{ij}^*(0)$  and  $y_{ijk}^*$  is sampled from  $\mathcal{N}(\mathbf{t}_{ik} b_{ij}^*, \mathbf{t}_{ik} \hat{\sigma}_j^2)$ .
  - (c) Use the simulated degradation paths as inputs to produce the bootstrap estimates  $\hat{\boldsymbol{\theta}}_b^*$  and compute  $\hat{F}^*(t)_b$  at desired values of  $t$ .
3. For each desired value of  $t$ , the bootstrap C.I. for  $F_{T_{\mathcal{D}}}(t; \boldsymbol{\theta}, \mathcal{D})$  is constructed as below:

- (a) Sort the bootstrap estimates  $\hat{F}^*(t)_1, \dots, \hat{F}^*(t)_B$  in increasing order giving  $\hat{F}^*(t)_{(b)}$ ,  $b = 1, 2, \dots, B$ .
- (b) The lower and upper bounds of point-wise approximate  $100(1 - \alpha)\%$  C.I. are  $[\hat{F}^*(t)_{(L)}, \hat{F}^*(t)_{(U)}]$ , where

$$L = B \times \Phi \left[ 2\Phi^{-1}(q) + \Phi^{-1}(\alpha/2) \right],$$

$$U = B \times \Phi \left[ 2\Phi^{-1}(q) + \Phi^{-1}(1 - \alpha/2) \right],$$

and  $q$  is the proportion of the bootstrap estimates  $\{\hat{F}^*(t)_b, b = 1, 2, \dots, B\}$  that are less than  $\hat{F}(t)$ .

## F Additional Results of the Simulation Studies

### F.1 Parameter Estimation v.s. Sample Size

Table F.1. RMSE ( $\times 10^{-3}$ ) of the EM Estimators versus Various Sample Sizes for Model  $M_0$ .

| $n$ | $m$ | $\mu_{b1} = 5$      | $\mu_{b2} = 4$         | $\mu_{b3} = 3$         | $\sigma_{b1}^2 = 1$    | $\sigma_{b2}^2 = 1$ | $\sigma_{b3}^2 = 1$    | $\rho_{12}^b = 0.8$    | $\rho_{13}^b = 0.8$    | $\rho_{23}^b = 0.8$ |
|-----|-----|---------------------|------------------------|------------------------|------------------------|---------------------|------------------------|------------------------|------------------------|---------------------|
| 10  | 15  | 359.462             | 374.314                | 378.424                | 516.805                | 533.453             | 597.773                | 309.720                | 289.675                | 311.681             |
|     | 30  | 342.470             | 343.790                | 352.317                | 472.246                | 495.023             | 503.878                | 225.580                | 236.438                | 237.803             |
| 20  | 15  | 249.888             | 257.263                | 266.886                | 373.677                | 396.473             | 418.752                | 151.479                | 168.434                | 173.639             |
|     | 30  | 230.232             | 236.228                | 243.990                | 335.944                | 351.598             | 363.669                | 124.962                | 133.352                | 135.559             |
| 30  | 15  | 204.209             | 211.188                | 215.520                | 316.638                | 340.905             | 336.138                | 128.798                | 134.425                | 141.356             |
|     | 30  | 194.144             | 194.325                | 194.959                | 299.082                | 296.896             | 292.872                | 97.158                 | 105.512                | 110.172             |
| $n$ | $m$ | $\rho_1^{ab} = 0.3$ | $\rho_{21}^{ab} = 0.1$ | $\rho_{31}^{ab} = 0.1$ | $\rho_{12}^{ab} = 0.1$ | $\rho_2^{ab} = 0.3$ | $\rho_{32}^{ab} = 0.1$ | $\rho_{13}^{ab} = 0.1$ | $\rho_{23}^{ab} = 0.1$ | $\rho_3^{ab} = 0.3$ |
| 10  | 15  | 362.520             | 390.217                | 390.688                | 406.921                | 359.368             | 401.831                | 399.684                | 388.667                | 382.170             |
|     | 30  | 342.195             | 376.332                | 376.780                | 375.708                | 335.164             | 364.781                | 381.185                | 370.214                | 367.230             |
| 20  | 15  | 241.739             | 262.323                | 257.455                | 266.883                | 262.288             | 271.117                | 279.115                | 269.515                | 255.695             |
|     | 30  | 231.929             | 251.544                | 239.608                | 251.092                | 235.895             | 256.363                | 261.803                | 254.358                | 242.954             |
| 30  | 15  | 201.022             | 214.112                | 205.828                | 227.788                | 197.356             | 215.606                | 223.178                | 219.262                | 205.130             |
|     | 30  | 190.243             | 202.372                | 198.693                | 207.799                | 188.226             | 204.507                | 207.734                | 209.684                | 187.273             |
| $n$ | $m$ | $\sigma_1^2 = 4$    | $\sigma_2^2 = 5$       | $\sigma_3^2 = 6$       |                        |                     |                        |                        |                        |                     |
| 10  | 15  | 473.280             | 565.385                | 708.471                |                        |                     |                        |                        |                        |                     |
|     | 30  | 336.107             | 415.068                | 505.324                |                        |                     |                        |                        |                        |                     |
| 20  | 15  | 330.421             | 415.113                | 503.831                |                        |                     |                        |                        |                        |                     |
|     | 30  | 233.559             | 290.281                | 356.259                |                        |                     |                        |                        |                        |                     |
| 30  | 15  | 262.920             | 337.809                | 398.403                |                        |                     |                        |                        |                        |                     |
|     | 30  | 195.457             | 242.525                | 282.553                |                        |                     |                        |                        |                        |                     |



## F.2 Parameter Estimation v.s. Degradation Curvature

In this section, we evaluate the performance of model estimation under different degradation curvatures. The simulation model used here is the same as in Section F.1, with the addition of time scale transformation using parameter  $\gamma_j$  for  $j = 1, 2, 3$ , set to 0.7, 1, and 1.3 for three different scenarios. The sample size is chosen from three options,  $n = 10, 20, 30$ , with  $m = 30$ . Figure F.1 displays the average RMSE across all parameters for each scenario. As expected, estimation accuracy improves with larger sample sizes. Interestingly, we also find that the shape of the degradation curve affects the estimation performance. Specifically, the convex degradation trend (i.e.,  $\gamma_j > 1$ ) results in the best performance among the three scenarios. This is because a convex degradation path implies a degradation rate that increases with the level of degradation, resulting in a larger value of degradation level for a fixed inspection period compared to concave or linear degradation paths. This can be interpreted as spanning a longer time horizon for the convex degradation scenario, resulting in more data points for parameter estimation and, therefore, lower RMSE values.

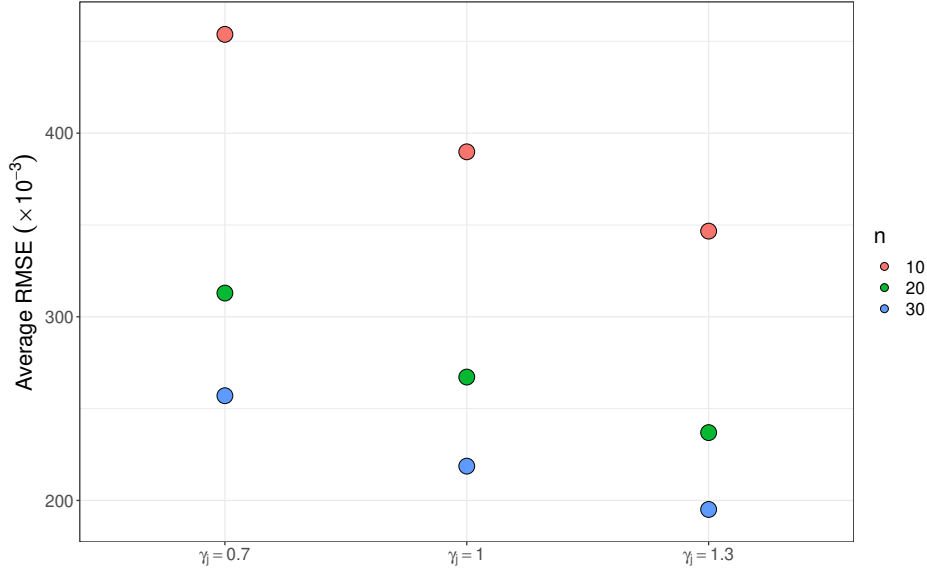

Figure F.1. Average RMSE ( $\times 10^{-3}$ ) of the EM Estimators versus Various Sample Sizes & Different Degradation Shapes for Model  $M_0$ .

## F.3 Parameter Estimation v.s. Correlation

In this section, we evaluate the performance of model estimation with different correlations. Specifically, we examine three options for both the PC-wise correlation and the initiation-growth correlation, denoted as  $\rho_b = 0.1, 0.5, 0.9$  and  $\rho_{ab} = 0.1, 0.5, 0.9$  across all processes.

The simulation model is the same as the one used in Section F.1 except for setting  $\rho_a = 0.9$ . Note that not all combinations of  $\rho_b$  and  $\rho_{ab}$  are feasible due to the positive definiteness of  $\Sigma$ . For simplicity, We provide two sample size options,  $n = 30, 60$  under  $m = 30$ . Similar to Figure 3, Table F.2 presents the average RMSE over the elements in  $\hat{\mu}_b$ ,  $\hat{\sigma}_b^2$ ,  $\hat{\rho}_b$ ,  $\hat{\rho}_j^{ab}$ ,  $\hat{\rho}_{jj'}^{ab}$ , and  $\hat{\sigma}^2$ . As expected, the estimation accuracy improves with the increase in sample size. Furthermore, the estimation performance of the parameters associated with  $\mu_b$ ,  $\sigma_b^2$ , and  $\sigma^2$  remains consistent regardless of the values of  $\rho_b$  and  $\rho_{ab}$ . However, the RMSE of  $\hat{\rho}_b$  decreases as  $\rho_b$  increases with a fixed  $\rho_{ab}$ . An identical pattern happens for  $\hat{\rho}_j^{ab}$  and  $\hat{\rho}_{jj'}^{ab}$  with the increase of  $\rho_{ab}$  given a fixed  $\rho_b$ . As we explained in Section 4.1, an intuitive explanation is that the stronger correlation results in more "similar" data, which can largely enhance the estimation accuracy.

Table F.2. RMSE ( $\times 10^{-3}$ ) of the EM Estimators versus Various Sample Sizes & Different Correlations for Model  $M_0$ .

| $n$ | $\rho_b$ | $\rho_{ab}$ | $\hat{\mu}_b$ | $\hat{\sigma}_b^2$ | $\hat{\rho}_b$ | $\hat{\rho}_j^{ab}$ | $\hat{\rho}_{jj'}^{ab}$ | $\hat{\sigma}^2$ |
|-----|----------|-------------|---------------|--------------------|----------------|---------------------|-------------------------|------------------|
| 30  | 0.1      | 0.1         | 192.099       | 301.397            | 222.328        | 207.739             | 207.629                 | 241.891          |
|     |          | 0.5         | 192.847       | 305.115            | 223.800        | 159.001             | 161.068                 | 242.450          |
|     | 0.5      | 0.1         | 195.392       | 299.110            | 178.413        | 206.851             | 208.678                 | 242.478          |
|     |          | 0.5         | 194.849       | 302.242            | 181.171        | 162.137             | 164.794                 | 241.457          |
|     | 0.9      | 0.1         | 196.184       | 293.784            | 69.351         | 205.118             | 204.360                 | 239.784          |
|     |          | 0.5         | 195.915       | 294.550            | 70.464         | 161.042             | 161.323                 | 239.966          |
|     |          | 0.9         | 197.229       | 294.034            | 67.075         | 55.094              | 54.395                  | 239.275          |
|     | 0.1      | 0.1         | 136.397       | 211.124            | 153.692        | 137.621             | 138.418                 | 173.192          |
|     |          | 0.5         | 135.022       | 217.858            | 151.598        | 108.135             | 108.959                 | 172.092          |
| 60  | 0.5      | 0.1         | 134.377       | 212.042            | 124.097        | 140.092             | 140.428                 | 171.244          |
|     |          | 0.5         | 134.774       | 213.864            | 124.189        | 107.096             | 108.884                 | 172.089          |
|     | 0.9      | 0.1         | 134.296       | 203.630            | 51.871         | 134.725             | 134.701                 | 170.703          |
|     |          | 0.5         | 133.444       | 207.328            | 51.384         | 107.025             | 107.371                 | 172.667          |
|     |          | 0.9         | 138.375       | 204.120            | 50.965         | 37.619              | 37.888                  | 172.696          |

#### F.4 Parameter Estimation v.s. Process Dimension

In this section, we evaluate the performance of our model estimation with different process dimensions, namely  $p = 3, 6, 9$ . We maintain the same simulation model as in Section F.1 for  $p = 3$ . For the other two dimensions, we increase the parameter setting proportionally. The sample size is set to  $n = 30, 45, 60$  under  $m = 30$ . Figure F.2 shows the average RMSE over all parameters for each scenario. As expected, the estimation accuracy improves with increased sample size and process dimensions. Figure F.3 presents the average execution time (in seconds) over 1,000 runs for each scenario. We should owe such a fast performance to the

model's tractability. Moreover, the average execution time increases approximately linearly with the number of PCs across different sample sizes, indicating that the EM algorithm reduces the optimization complexity as  $p$  increases.

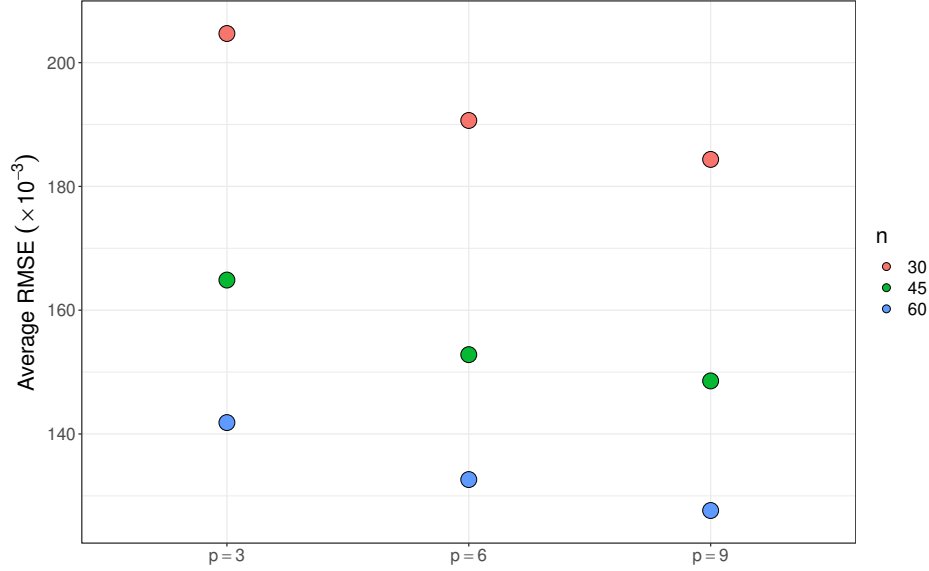

Figure F.2. Average RMSE ( $\times 10^{-3}$ ) of the EM Estimators versus Various Sample Sizes & Different Process Dimensions for Model  $M_0$ .

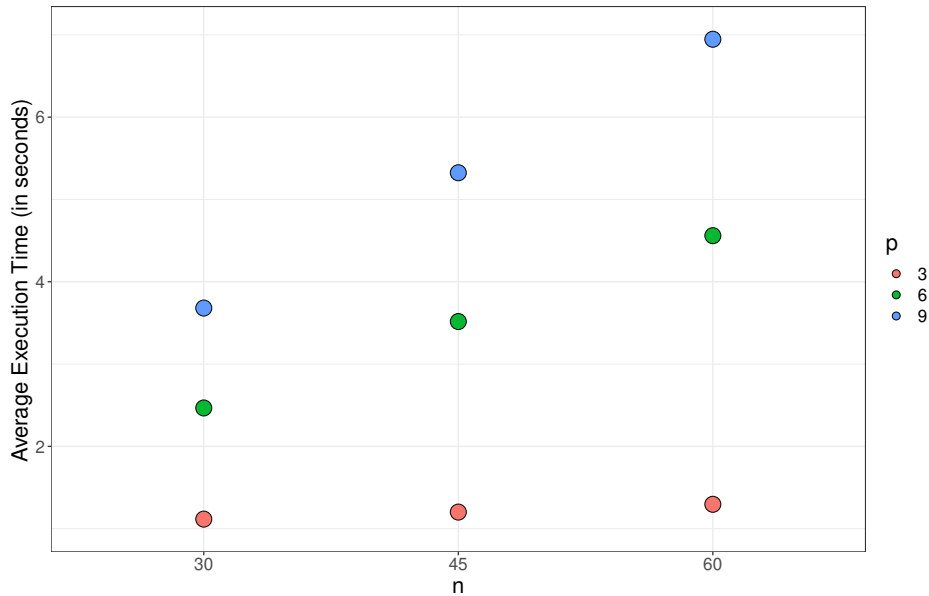

Figure F.3. Average Execution Time (in seconds) versus Various Sample Sizes & Different Process Dimensions for Model  $M_0$ . The CPU utilized was Apple M1 Max.

## F.5 Parameter Estimation v.s. Sample Size for Models $M_2$ - $M_4$

Tables F.3-F.5 report the RMSE of each EM estimator versus various sample sizes for models  $M_2$ ,  $M_3$ , and  $M_4$ , respectively. Figures F.4-F.6 present the result in dot plots.

Table F.3. RMSE ( $\times 10^{-3}$ ) of the EM Estimators versus Various Sample Sizes for Model  $M_2$ .

| $n$ | $m$ | $\mu_{b1} = 5$ | $\mu_{b2} = 4$ | $\mu_{b3} = 3$ | $\sigma_{b1}^2 = 1$ | $\sigma_{b2}^2 = 1$ | $\sigma_{b3}^2 = 1$ |
|-----|-----|----------------|----------------|----------------|---------------------|---------------------|---------------------|
| 10  | 15  | 360.160        | 364.414        | 372.807        | 538.000             | 571.864             | 591.195             |
|     | 30  | 337.767        | 338.629        | 352.016        | 496.023             | 499.533             | 495.752             |
| 20  | 15  | 252.453        | 251.089        | 262.098        | 390.422             | 412.515             | 404.823             |
|     | 30  | 236.565        | 238.566        | 241.661        | 359.499             | 354.143             | 354.721             |
| 30  | 15  | 201.990        | 201.570        | 212.674        | 319.143             | 340.954             | 347.944             |
|     | 30  | 190.541        | 193.984        | 197.665        | 276.825             | 288.780             | 303.815             |

  

| $n$ | $m$ | $\rho_{12}^b = 0.2$ | $\rho_{13}^b = 0.5$ | $\rho_{23}^b = 0.8$ | $\sigma_1^2 = 4$ | $\sigma_2^2 = 5$ | $\sigma_3^2 = 6$ |
|-----|-----|---------------------|---------------------|---------------------|------------------|------------------|------------------|
| 10  | 15  | 480.987             | 399.091             | 312.531             | 464.433          | 592.667          | 717.696          |
|     | 30  | 403.805             | 346.623             | 243.560             | 337.117          | 426.715          | 498.320          |
| 20  | 15  | 309.295             | 275.455             | 178.541             | 334.129          | 425.471          | 494.984          |
|     | 30  | 261.167             | 226.606             | 135.089             | 236.299          | 294.711          | 357.622          |
| 30  | 15  | 244.629             | 203.792             | 140.049             | 270.397          | 342.539          | 403.960          |
|     | 30  | 215.181             | 176.020             | 108.819             | 194.711          | 242.391          | 286.069          |

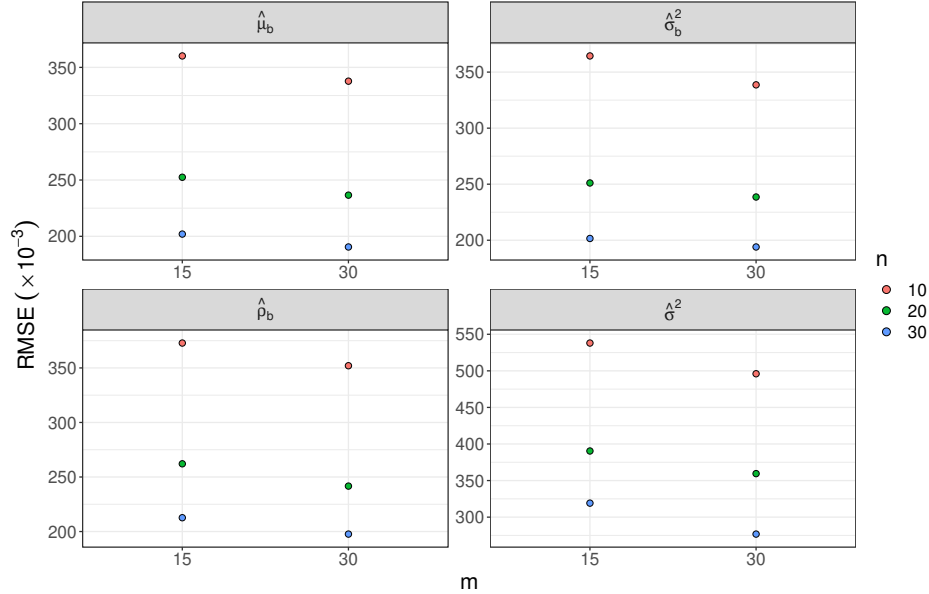

Figure F.4. RMSE ( $\times 10^{-3}$ ) of the EM Estimators versus Various Sample Sizes for Model  $M_2$ .

Table F.4. RMSE ( $\times 10^{-3}$ ) of the EM Estimators versus Various Sample Sizes for Model  $M_3$ .

| $n$ | $m$ | $\mu_b = 5$ | $\sigma_b^2 = 0.8$ | $\rho_{ab} = 0.3$ | $\sigma^2 = 4$ |
|-----|-----|-------------|--------------------|-------------------|----------------|
| 10  | 15  | 331.902     | 457.343            | 420.690           | 481.095        |
|     | 30  | 310.153     | 399.560            | 373.319           | 333.234        |
| 20  | 15  | 228.935     | 321.202            | 264.827           | 343.880        |
|     | 30  | 219.074     | 287.086            | 239.177           | 241.143        |
| 30  | 15  | 188.163     | 262.644            | 210.879           | 282.759        |
|     | 30  | 177.502     | 235.491            | 192.328           | 193.293        |

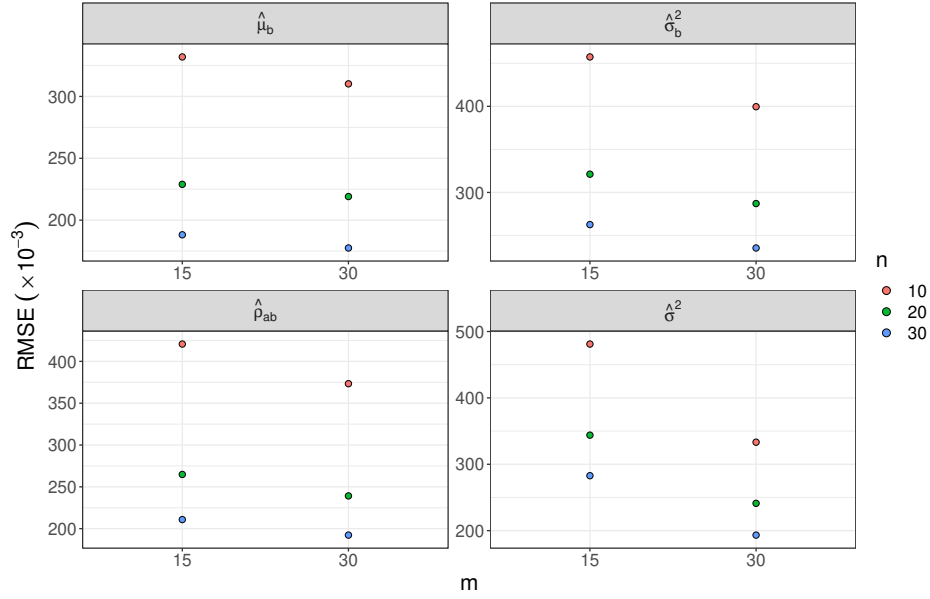

Figure F.5. RMSE ( $\times 10^{-3}$ ) of the EM Estimators versus Various Sample Sizes for Model  $M_3$ .

Table F.5. RMSE ( $\times 10^{-3}$ ) of the EM Estimators versus Various Sample Sizes for Model  $M_4$ .

| $n$ | $m$ | $\mu_{b1} = 5$ | $\mu_{b2} = 4$ | $\mu_{b3} = 3$ | $\sigma_b^2 = 0.3$ |
|-----|-----|----------------|----------------|----------------|--------------------|
| 10  | 15  | 866.676        | 707.980        | 544.569        | 145.050            |
|     | 30  | 856.739        | 692.006        | 526.826        | 143.221            |
| 20  | 15  | 625.505        | 504.186        | 394.991        | 108.452            |
|     | 30  | 616.987        | 499.773        | 380.737        | 106.654            |
| 30  | 15  | 527.456        | 433.197        | 327.585        | 97.005             |
|     | 30  | 527.685        | 417.587        | 324.924        | 95.920             |

---

| $n$ | $m$ | $\rho_{ab} = 0.5$ | $\sigma_1^2 = 4$ | $\sigma_2^2 = 5$ | $\sigma_3^2 = 6$ |
|-----|-----|-------------------|------------------|------------------|------------------|
| 10  | 15  | 315.525           | 551.582          | 599.043          | 704.054          |
|     | 30  | 297.286           | 334.369          | 420.084          | 502.618          |
| 20  | 15  | 210.385           | 313.642          | 410.793          | 536.728          |
|     | 30  | 203.555           | 225.932          | 301.844          | 368.702          |
| 30  | 15  | 150.133           | 285.624          | 321.885          | 392.115          |
|     | 30  | 150.834           | 190.286          | 227.986          | 290.951          |

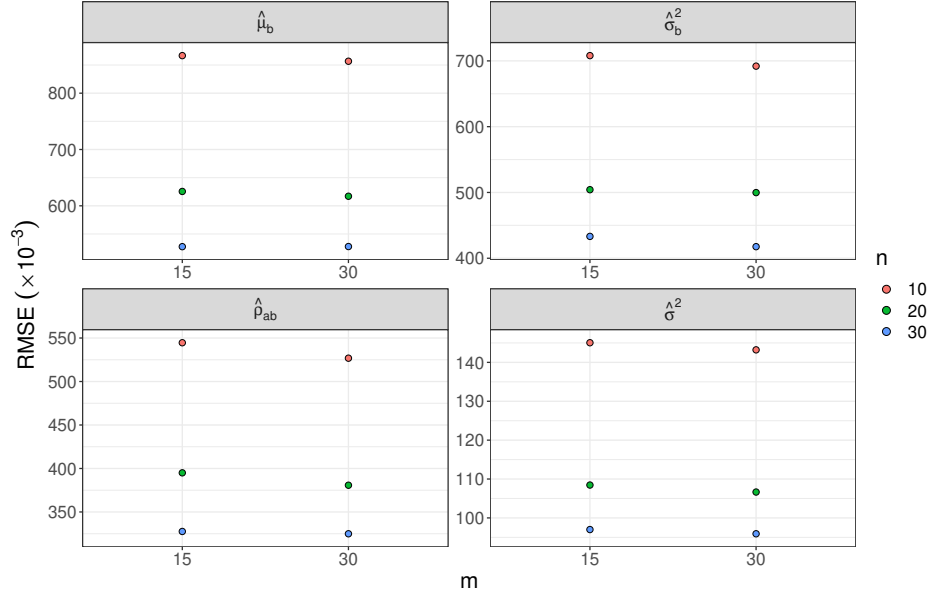

Figure F.6. RMSE ( $\times 10^{-3}$ ) of the EM Estimators versus Various Sample Sizes for Model  $M_4$ .

## G Additional Result of the Case Studies

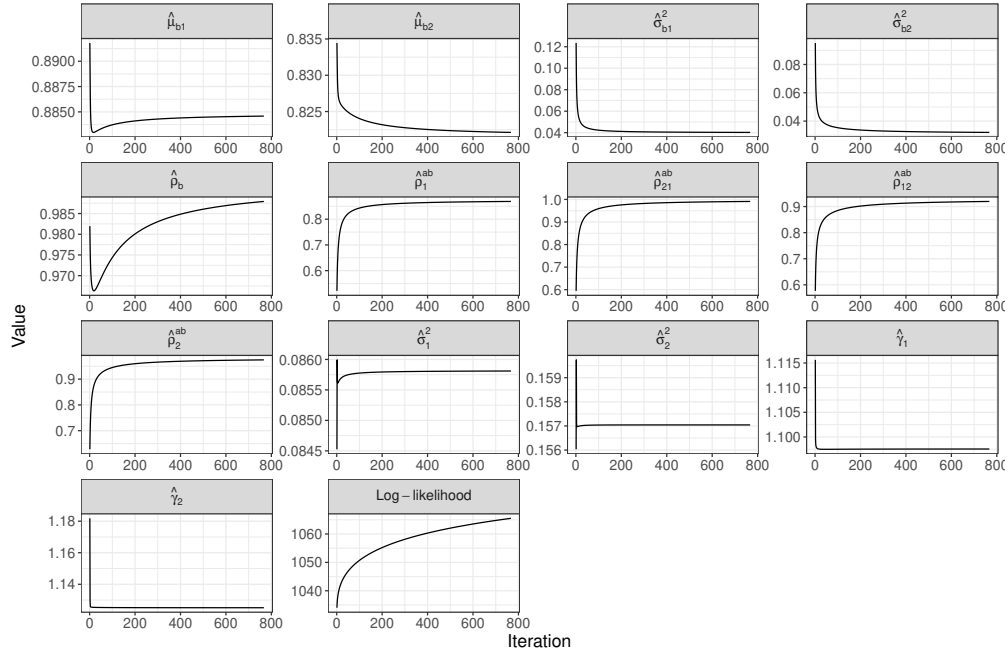

Figure G.1. Parameter Estimates over Iteration for Model  $M_0$  regarding the Transceiver Degradation Data.

Table G.1. IRLED Degradation Data.

| Unit       | Aging Time ( $\times 10$ Hours) |     |     |     |      |      |      |      |      |      |      |
|------------|---------------------------------|-----|-----|-----|------|------|------|------|------|------|------|
|            | 0                               | 0.6 | 1.2 | 2.4 | 4.8  | 9.6  | 15.6 | 23.0 | 32.4 | 47.9 | 63.5 |
| <u>PC1</u> |                                 |     |     |     |      |      |      |      |      |      |      |
| 1          | 0                               | 4.3 | 6.5 | 7.8 | 13.0 | 21.7 | 33.0 | 42.1 | 49.9 | 59.9 | 78.6 |
| 2          | 0                               | 1.4 | 2.7 | 5.0 | 7.8  | 14.5 | 23.3 | 29.0 | 43.3 | 59.8 | 77.4 |
| 3          | 0                               | 3.4 | 4.6 | 7.8 | 13.0 | 16.8 | 26.8 | 34.1 | 41.5 | 67.0 | 65.5 |
| 4          | 0                               | 3.2 | 4.3 | 5.8 | 9.9  | 15.2 | 20.3 | 26.2 | 33.6 | 39.5 | 53.2 |
| 5          | 0                               | 3.7 | 5.6 | 8.0 | 12.8 | 16.0 | 23.7 | 26.7 | 38.4 | 49.2 | 47.2 |
| 6          | 0                               | 0.1 | 0.4 | 0.7 | 2.0  | 3.5  | 6.6  | 12.2 | 18.8 | 32.3 | 47.0 |
| 7          | 0                               | 0.8 | 1.7 | 2.8 | 4.6  | 7.9  | 12.4 | 20.2 | 24.8 | 32.5 | 45.5 |
| <u>PC2</u> |                                 |     |     |     |      |      |      |      |      |      |      |
| 1          | 0                               | 2.3 | 3.7 | 5.6 | 8.8  | 13.7 | 17.2 | 24.8 | 29.1 | 42.9 | 45.3 |
| 2          | 0                               | 0.2 | 0.4 | 0.9 | 2.4  | 4.5  | 7.1  | 13.4 | 21.2 | 30.7 | 41.7 |
| 3          | 0                               | 0.5 | 0.9 | 1.9 | 3.5  | 5.9  | 10.0 | 14.4 | 22.0 | 26.0 | 31.8 |
| 4          | 0                               | 2.6 | 4.4 | 6.0 | 8.7  | 14.6 | 16.8 | 17.9 | 23.2 | 27.0 | 31.3 |
| 5          | 0                               | 4.3 | 5.8 | 9.5 | 10.2 | 13.8 | 20.6 | 19.7 | 25.3 | 33.4 | 27.9 |
| 6          | 0                               | 3.6 | 4.7 | 6.2 | 9.1  | 11.7 | 13.8 | 14.5 | 15.5 | 23.1 | 24.0 |
| 7          | 0                               | 0.5 | 0.9 | 1.4 | 3.3  | 5.0  | 6.1  | 9.9  | 13.2 | 17.0 | 20.7 |

Table G.2. Parameter Point Estimates and Standard Errors (shown in parentheses), along with Log-likelihood for Various Models regarding the IRLED Degradation Data.

|       | $\hat{\mu}_{b1}$   | $\hat{\mu}_{b2}$   | $\hat{\sigma}_{b1}^2$ | $\hat{\sigma}_{b2}^2$ | $\hat{\rho}_{12}^b$ | $\hat{\sigma}_1^2$ | $\hat{\sigma}_2^2$ | $\hat{\gamma}_1$      | $\hat{\gamma}_2$      | Log-likelihood      |
|-------|--------------------|--------------------|-----------------------|-----------------------|---------------------|--------------------|--------------------|-----------------------|-----------------------|---------------------|
| $M_2$ | 2.237<br>(0.443)   | 2.063<br>(0.454)   | 0.183<br>(0.163)      | 0.197<br>(0.210)      | 0.999<br>(0.487)    | 3.181<br>(0.674)   | 2.866<br>(0.677)   | 0.789<br>(0.042)      | 0.662<br>(0.048)      | -296.332            |
|       | $\hat{\mu}_{a1}$   | $\hat{\mu}_{a2}$   | $\hat{\sigma}_{a1}^2$ | $\hat{\sigma}_{a2}^2$ | $\hat{\rho}_{12}^a$ | $\hat{\mu}_{b1}$   | $\hat{\mu}_{b2}$   | $\hat{\sigma}_{b1}^2$ | $\hat{\sigma}_{b2}^2$ | $\hat{\rho}_{12}^b$ |
| $M_1$ | 2.414<br>(0.556)   | 2.000<br>(0.497)   | 2.631<br>(1.033)      | 2.673<br>(1.057)      | 0.192<br>(0.408)    | 1.402<br>(0.298)   | 1.172<br>(0.309)   | 0.074<br>(0.067)      | 0.085<br>(0.106)      | 0.999<br>(0.439)    |
|       | $\hat{\sigma}_1^2$ | $\hat{\sigma}_2^2$ | $\hat{\gamma}_1$      | $\hat{\gamma}_2$      | Log-likelihood      |                    |                    |                       |                       |                     |
|       | 2.007<br>(0.463)   | 1.618<br>(0.389)   | 0.893<br>(0.047)      | 0.783<br>(0.053)      | -286.920            |                    |                    |                       |                       |                     |

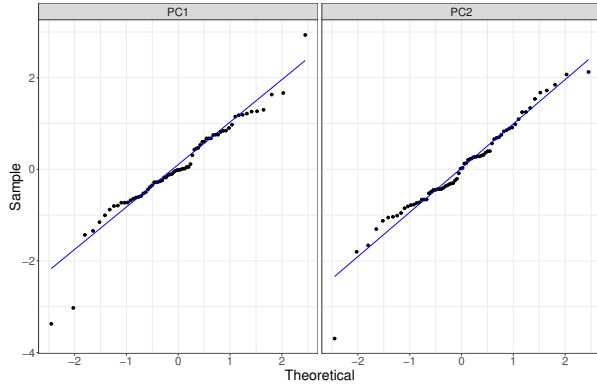

(a) Model  $M_2$ .

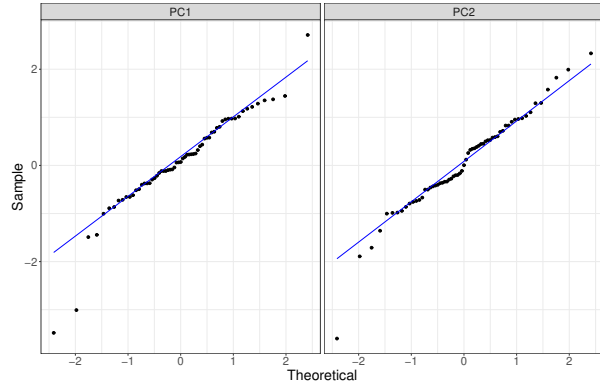

(b) Model  $M_1$ .

Figure G.2. Normal Q-Q Plots for Various Models regarding the IRLED Degradation Data.

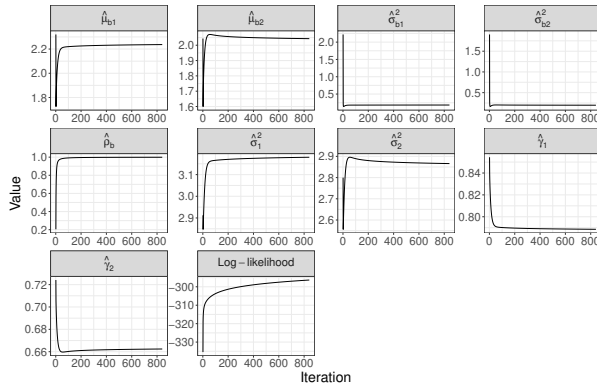

(a) Model  $M_2$ .

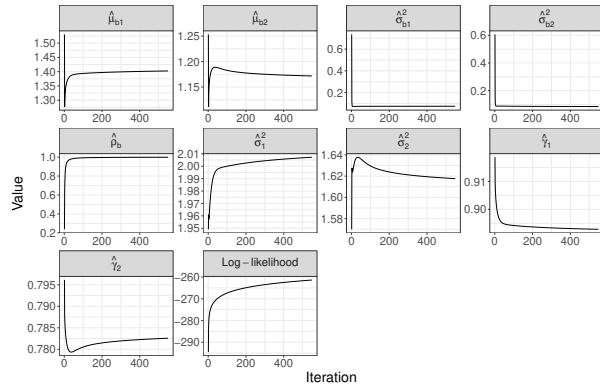

(b) Model  $M_1$ .

Figure G.3. Parameter Estimates over Iteration for Various Models regarding the IRLED Degradation Data.



## H List of Notations

---

|                 |                                                                   |
|-----------------|-------------------------------------------------------------------|
| <b>Indices:</b> |                                                                   |
| $n$             | number of units ( $i \in \{1, \dots, n\}$ )                       |
| $p$             | number of performance characteristics ( $j \in \{1, \dots, p\}$ ) |
| $m_i$           | number of measurements ( $k \in \{1, \dots, m_i\}$ )              |

---

|                              |                                                                                                                                                                         |
|------------------------------|-------------------------------------------------------------------------------------------------------------------------------------------------------------------------|
| <b>Random Variables:</b>     |                                                                                                                                                                         |
| $\mathbf{Y}_i(t)$            | degradation values on unit $i$ at time $t$ , where $\mathbf{Y}_i(t) = (Y_{i1}(t), Y_{i2}(t), \dots, Y_{ip}(t))'$ with $\mathbf{Y}_i(0)$ representing the initial levels |
| $\tilde{\mathbf{Y}}_i(t, 0)$ | degradation increments from time 0 to $t$ , where $\tilde{\mathbf{Y}}_i(t, 0) = \mathbf{Y}_i(t) - \mathbf{Y}_i(0)$                                                      |
| $\mathbf{b}_i$               | degradation rates, where $\mathbf{b}_i = (b_{i1}, b_{i2}, \dots, b_{ip})'$                                                                                              |
| $\mathcal{B}_p(t)$           | the standard $p$ -dimensional Brownian motion (Wiener process)                                                                                                          |

---

|                        |                                                                                                                                                                                                                                                                                                                                                                                                                                                                                                                                                                                                         |
|------------------------|---------------------------------------------------------------------------------------------------------------------------------------------------------------------------------------------------------------------------------------------------------------------------------------------------------------------------------------------------------------------------------------------------------------------------------------------------------------------------------------------------------------------------------------------------------------------------------------------------------|
| <b>Data:</b>           |                                                                                                                                                                                                                                                                                                                                                                                                                                                                                                                                                                                                         |
| $t_{ik}$               | the elapsed time when the $k$ -th measurement on unit $i$ is taken                                                                                                                                                                                                                                                                                                                                                                                                                                                                                                                                      |
| $\tilde{t}_{ik}$       | measurement time interval with $\tilde{t}_{ik} = t_{ik} - t_{i,k-1}$                                                                                                                                                                                                                                                                                                                                                                                                                                                                                                                                    |
| $\tau_{ijk}$           | transformed time interval replacing $\tilde{t}_{ik}$ with $\tau_{ijk} = \Lambda_j(t_{ik}) - \Lambda_j(t_{i,k-1})$ if time scale transformation is applicable                                                                                                                                                                                                                                                                                                                                                                                                                                            |
| $y_{ijk}$              | degradation measurement of process $j$ on unit $i$ at time point $k$                                                                                                                                                                                                                                                                                                                                                                                                                                                                                                                                    |
| $\tilde{y}_{ijk}$      | degradation increment with $\tilde{y}_{ijk} = y_{ijk} - y_{i,j,k-1}$                                                                                                                                                                                                                                                                                                                                                                                                                                                                                                                                    |
| $\tilde{\mathbf{y}}_i$ | collection of all the degradation increments on unit $i$ , where $\tilde{\mathbf{y}}_{ik} = (\tilde{y}_{i1k}, \tilde{y}_{i2k}, \dots, \tilde{y}_{ipk})'$ and $\tilde{\mathbf{y}}_i = \begin{pmatrix} \tilde{\mathbf{y}}'_{i1} \\ \tilde{\mathbf{y}}'_{i2} \\ \vdots \\ \tilde{\mathbf{y}}'_{im_i} \end{pmatrix} = \begin{pmatrix} \tilde{y}_{i11} & \tilde{y}_{i21} & \cdots & \tilde{y}_{ip1} \\ \tilde{y}_{i12} & \tilde{y}_{i22} & \cdots & \tilde{y}_{ip2} \\ \vdots & \vdots & \ddots & \vdots \\ \tilde{y}_{i1m_i} & \tilde{y}_{i2m_i} & \cdots & \tilde{y}_{ipm_i} \end{pmatrix}_{m_i \times p}$ |
| $\tilde{\mathbf{t}}_i$ | collection of all the time intervals on unit $i$ , where $\tilde{\mathbf{t}}_i = (\tilde{t}_{i1}, \tilde{t}_{i2}, \dots, \tilde{t}_{im_i})'$                                                                                                                                                                                                                                                                                                                                                                                                                                                            |
| $\mathbb{Y}_0$         | collection of all the initial degradation levels, where $\mathbf{y}_{i0} = (y_{i10}, y_{i20}, \dots, y_{ip0})'$ and $\mathbb{Y}_0 = \begin{pmatrix} \mathbf{y}'_{10} \\ \mathbf{y}'_{20} \\ \vdots \\ \mathbf{y}'_{n0} \end{pmatrix} = \begin{pmatrix} y_{110} & y_{120} & \cdots & y_{1p0} \\ y_{210} & y_{220} & \cdots & y_{2p0} \\ \vdots & \vdots & \ddots & \vdots \\ y_{n10} & y_{n20} & \cdots & y_{np0} \end{pmatrix}_{n \times p}$                                                                                                                                                            |
| $\mathbb{D}$           | collection of degradation increments and time intervals, where $\mathbb{D} = \{\tilde{\mathbf{y}}_1, \tilde{\mathbf{y}}_2, \dots, \tilde{\mathbf{y}}_n, \tilde{\mathbf{t}}_1, \tilde{\mathbf{t}}_2, \dots, \tilde{\mathbf{t}}_n\}$                                                                                                                                                                                                                                                                                                                                                                      |
| $\mathcal{D}$          | vector of all the failure thresholds with $\mathcal{D} = (\mathcal{D}_1, \mathcal{D}_2, \dots, \mathcal{D}_p)'$                                                                                                                                                                                                                                                                                                                                                                                                                                                                                         |

---

---

**Parameters:**

|                            |                                                                                                                                                                                                                                                                                                                                                                                                                                                                                     |
|----------------------------|-------------------------------------------------------------------------------------------------------------------------------------------------------------------------------------------------------------------------------------------------------------------------------------------------------------------------------------------------------------------------------------------------------------------------------------------------------------------------------------|
| $\boldsymbol{\mu}_a$       | mean vector of the initial levels, where $\boldsymbol{\mu}_a = (\mu_{a1}, \mu_{a2}, \dots, \mu_{ap})'$                                                                                                                                                                                                                                                                                                                                                                              |
| $\boldsymbol{\mu}_b$       | mean vector of the degradation rates, where $\boldsymbol{\mu}_b = (\mu_{b1}, \mu_{b2}, \dots, \mu_{bp})'$                                                                                                                                                                                                                                                                                                                                                                           |
| $\boldsymbol{\sigma}_a^2$  | variance vector of the initial levels, where $\boldsymbol{\sigma}_a^2 = (\sigma_{a1}^2, \sigma_{a2}^2, \dots, \sigma_{ap}^2)'$                                                                                                                                                                                                                                                                                                                                                      |
| $\boldsymbol{\rho}_a$      | correlation vector of the initial levels, where $\boldsymbol{\rho}_a = (\rho_{12}^a, \rho_{13}^a, \dots, \rho_{p-1,p}^a)'$                                                                                                                                                                                                                                                                                                                                                          |
| $\boldsymbol{\sigma}_b^2$  | variance vector of the degradation rates, where $\boldsymbol{\sigma}_b^2 = (\sigma_{b1}^2, \sigma_{b2}^2, \dots, \sigma_{bp}^2)'$                                                                                                                                                                                                                                                                                                                                                   |
| $\boldsymbol{\rho}_b$      | correlation vector of the degradation rates, where $\boldsymbol{\rho}_b = (\rho_{12}^b, \rho_{13}^b, \dots, \rho_{p-1,p}^b)'$                                                                                                                                                                                                                                                                                                                                                       |
| $\boldsymbol{\rho}_{ab}$   | cross-correlation vector, where<br>$\boldsymbol{\rho}_{ab} = (\rho_1^{ab}, \rho_2^{ab}, \dots, \rho_p^{ab}, \rho_{12}^{ab}, \rho_{13}^{ab}, \dots, \rho_{p-1,p}^{ab}, \rho_{21}^{ab}, \rho_{31}^{ab}, \dots, \rho_{p,p-1}^{ab})'$                                                                                                                                                                                                                                                   |
| $\boldsymbol{\sigma}^2$    | variance vector of the standard Brownian motion, where $\boldsymbol{\sigma}^2 = (\sigma_1^2, \sigma_2^2, \dots, \sigma_p^2)'$                                                                                                                                                                                                                                                                                                                                                       |
| $\boldsymbol{\gamma}$      | vector of the time-scale transformation parameters, where $\boldsymbol{\gamma} = (\gamma_1, \gamma_2, \dots, \gamma_p)'$                                                                                                                                                                                                                                                                                                                                                            |
| $\boldsymbol{\Sigma}_a$    | variance-covariance matrix of the initial levels, where<br>$\boldsymbol{\Sigma}_a = \begin{pmatrix} \sigma_{a1}^2 & \sigma_{12}^a & \cdots & \sigma_{1p}^a \\ \sigma_{12}^a & \sigma_{a2}^2 & \cdots & \sigma_{2p}^a \\ \vdots & \vdots & \ddots & \vdots \\ \sigma_{1p}^a & \sigma_{2p}^a & \cdots & \sigma_{ap}^2 \end{pmatrix}$                                                                                                                                                  |
| $\boldsymbol{\Sigma}_b$    | variance-covariance matrix of the degradation rates, where<br>$\boldsymbol{\Sigma}_b = \begin{pmatrix} \sigma_{b1}^2 & \sigma_{12}^b & \cdots & \sigma_{1p}^b \\ \sigma_{12}^b & \sigma_{b2}^2 & \cdots & \sigma_{2p}^b \\ \vdots & \vdots & \ddots & \vdots \\ \sigma_{1p}^b & \sigma_{2p}^b & \cdots & \sigma_{bp}^2 \end{pmatrix}$                                                                                                                                               |
| $\boldsymbol{\Sigma}_{ab}$ | cross-covariance matrix, where $\boldsymbol{\Sigma}_{ab} = \begin{pmatrix} \sigma_1^{ab} & \sigma_{12}^{ab} & \cdots & \sigma_{1p}^{ab} \\ \sigma_{21}^{ab} & \sigma_2^{ab} & \cdots & \sigma_{2p}^{ab} \\ \vdots & \vdots & \ddots & \vdots \\ \sigma_{p1}^{ab} & \sigma_{p2}^{ab} & \cdots & \sigma_p^{ab} \end{pmatrix}$                                                                                                                                                         |
| $\mathbf{D}$               | diagonal matrix of $\boldsymbol{\sigma}^2$ , where $\mathbf{D} = \text{diag}(\sigma_1^2, \sigma_2^2, \dots, \sigma_p^2)$                                                                                                                                                                                                                                                                                                                                                            |
| $\boldsymbol{\theta}$      | collection of all the unknown parameters, where $\boldsymbol{\theta} = \{\boldsymbol{\mu}_a, \boldsymbol{\mu}_b, \boldsymbol{\Sigma}_a, \boldsymbol{\Sigma}_b, \boldsymbol{\Sigma}_{ab}, \mathbf{D}\}$<br>or $\boldsymbol{\theta} = (\boldsymbol{\mu}'_a, \boldsymbol{\mu}'_b, \boldsymbol{\sigma}'_a, \boldsymbol{\rho}'_a, \boldsymbol{\sigma}'_b, \boldsymbol{\rho}'_b, \boldsymbol{\rho}'_{ab}, \boldsymbol{\sigma}'^2)'$ with $\boldsymbol{\gamma}$ adding to it if applicable |

---

**Others:**

|              |                                                         |
|--------------|---------------------------------------------------------|
| $a_i$        | the common random initial level for model $M_4$         |
| $b_i$        | the common random degradation rate for model $M_4$      |
| $\sigma_a^2$ | the variance of $a_i$ for model $M_4$                   |
| $\sigma_b^2$ | the variance of $b_i$ for model $M_4$                   |
| $\rho_{ab}$  | the correlation between $a_i$ and $b_i$ for model $M_4$ |

---

# I Description of Data & Codes

The repository ([https://github.com/hnasu-code/multi\\_wiener](https://github.com/hnasu-code/multi_wiener)) contains the following files:

1. “run\_Table5.R”: The main R file to reproduce Table 5 in the paper.
2. “func\_start.R”: The R function that finds the helpful starting point for the EM algorithm.
3. “func\_M0.R”: The R function that performs the EM algorithm for model M0.
4. “func\_M2.R”: The R function that performs the EM algorithm for model M2.
5. “func\_M3.R”: The R function that performs the EM algorithm for model M3.
6. “func\_M4.R”: The R function that performs the EM algorithm for model M4.
7. “IRLED.csv”: The CSV file storing the raw IRLED degradation Data.

Instructions: To execute the code, ensure that all the files mentioned above are placed in a common folder. Then, open “run\_Table5.R” in either RStudio or R terminal and install all the relevant packages as claimed at the beginning. Run the code line by line under each code section in terms of a corresponding candidate model to obtain the results, which include the log-likelihood and AIC values.

## References

- Hoff, P. D. (2009). *A first course in Bayesian statistical methods*. Springer.
- Li, H., Pan, D., and Chen, C. L. P. (2015). Reliability modeling and life estimation using an expectation maximization based Wiener degradation model for momentum wheels. *IEEE Transactions on Cybernetics*, 45(5):969–977.
- Rencher, A. C. and Schaalje, G. B. (2008). *Linear models in statistics*. John Wiley & Sons.
